# Supplementary material for: Magmatic sulphides in high-K calc-alkaline to shoshonitic andalkaline rocks
Source: Copernicus journal article supplement (doi:10.5194/se-2019-106), 2019-07-26

# Magmatic sulfides in high-K calc-alkaline to shoshonitic and alkaline rocks

Ariadni Georgatou<sup>1</sup>, Massimo Chiaradia<sup>1</sup>

<sup>1</sup>Department of Earth Sciences, University of Geneva, Rue des Maraichers 13, 1205 Geneva, Switzerland

Correspondence to: Ariadni Georgatou (ariadni.georgatou@unige.ch)

**Abstract.** We investigate ~~in both mineralised and barren systems~~ the occurrence and chemistry of magmatic sulfides and their chalcophile metal cargo behaviour during the evolution of compositionally different magmas ~~in~~ from diverse geodynamic settings both in mineralised and barren systems. The investigated areas are: (a) the Miocene Konya magmatic province (hosting the Doganbey Cu-Mo porphyry and Inlice Au-epithermal deposits/Post-Subduction) and (b) the Miocene Usak basin (Elmadag, Itecektepe and Beydagi volcanoes, the latter associated with the Kisladag Au porphyry, in Western Turkey/Post-Subduction). For comparison we also investigate (c) the barren intraplate Plio-Quaternary Kula volcanic field, west of Usak. ~~Antraplate and finally,~~ we discuss and compare all the above areas with the already studied (d) Quaternary Ecuadorian volcanic arc (host to the Miocene Llurimagua Cu-Mo and Cascabel Cu-Au porphyry deposits/Subduction). The volcanism of the newly studied areas ranges from basalts to andesites/dacites and from high K-calc-alkaline to shoshonitic series. Multiphase magmatic sulfides occur in different amounts in rocks of all investigated areas, and, based on textural and compositional differences, they can be classified into different types, ~~which crystallised according to their crystallisation~~ at different times/stages of magma evolution (early versus late saturation). Our results suggest that independently of the magma composition, geodynamic setting and whether or not the system has generated an ore deposit on the surface, sulfide saturation occurred in variable degrees in all studied areas and investigated magmatic systems. Those systems present and is characterised by a similar initial metal contents of the magmas. However not all studied areas present all sulfide types and the sulfide composition is dependent depends on the nature of the host mineral. A decrease in the sulfide Ni/Cu (proxy for mss-monosulfide solid solution/iss-intermediate solid solution) ratio is noted with magmatic evolution. At an early stage, Ni-rich/Cu-poorer sulfides are hosted by early crystallising minerals, e.g., olivine/pyroxene, whereas, at a later stage, Cu-rich sulfides are hosted by magnetite. The most common sulfide type ~~resulting from the~~ early saturation stage is composed of a Cu-poor/Ni-rich (pyrrhotite/mss) and one/two Cu-rich (cubanite, chalcopyrite/iss) phases making up ~84 and ~16 area % of the sulfide, respectively. ~~Our results suggest that independently of the magma composition, geodynamic setting and whether or not the system has generated an ore deposit on the surface, sulfide saturation occurred in variable degrees in all studied areas and magmatic systems and is characterised by a similar initial metal content of the magmas. However not all studied areas present all sulfide types and the sulfide composition is dependent on the nature of the host mineral. In particular s~~ Sulfides resulting from the late stage, consisting of Cu-rich phases (chalcopyrite, bornite, digenite/iss), are hosted exclusively by magnetite and are found only in evolved rocks (andesites and dacites) of magmatic provinces associated with porphyry Cu (Konya and Ecuador) and porphyry Au (Beydagi) deposits.

## Commented [AAG1]:

After the comment of Referee#1-Dan Smith:

Co: Move highlighted text to here

R: We accepted the suggestions.

Ch: We moved the paragraph where indicated.

## 1. Introduction

Historically, petrographic and mineral chemistry studies of magmatic sulfides have been carried out on magmatic sulfides associated with orthomagmatic Ni-Cu-PGE mineralised systems (e.g., Barnes et al., 2017, Mungall and Brenan, 2014). Recent studies, however, highlight the growing interest of research towards magmatic sulfides in porphyry ore-associated magma (e.g. Halter et al., 2005, Brennecke, 2006, Zhang and Audétat, 2017) and in barren volcanic arc provinces (e.g., Nadeau et al., 2010, Park et al., 2015, Fulignati et al., 2018, Zelenski et al., 2017, Keith et al., 2017, Savelyev et al., 2018) in order to track processes affecting the fertility of these systems. In fact, it is still unclear how sulfide saturation affects the process of magmatic-hydrothermal ore formation. On one hand early sulfide saturation will strip off chalcophile and siderophile elements from the melt rendering the residual melt less fertile. On the other hand magmatic sulfide- and metal-rich cumulates may represent a temporary storage, which subsequently releases chalcophile metals to the magmatic hydrothermal system (e.g. Nadeau et al., 2010, Wilkinson, 2013, Fontboté et al., 2017).

Georgatou et al. (2018) described the occurrence, texture and composition of magmatic sulfides in relation to the whole rock chemistry of Quaternary Ecuadorian volcanic rocks. Sulfides were found in all rocks ranging in composition from basalts to dacites, occurring as polymineralic inclusions composed of Fe-rich/Cu-poor and Cu-rich phases. The inclusions, of variable size (mostly 1-30 µm) and shape (globular, ellipsoidal, angular and irregular), were hosted mostly by Fe-oxides (magnetite-45%) and, to a lesser extent, by silicates (amphibole-27%, plagioclase-16% and pyroxene-12% and plagioclase). The Quaternary Ecuadorian volcanism represents a typical example of high Sr/Y calc-alkaline magmas (with SiO<sub>2</sub> = 50-67 wt%) occurring in a subduction geodynamic setting potentially related (Loucks, 2014, Chiaradia and Caricchi, 2017) to porphyry-type ~~and epithermal~~ deposits (e.g. ~~Junin, the~~ Llurimagua Cu-Mo and ~~the~~ Cascabel Cu-Au Tertiary (~~Scütte et al., 2012~~) porphyry deposits and ~~the~~ El Corazon high sulphidation Au Miocene epithermal deposit).

Although the majority of porphyry Cu (± Au) deposits are formed in association with Andean-type subduction-related magmas (e.g. Sillitoe, 1972, Cooke et al., 2005) there is a growing evidence that ~~numerous~~ porphyry deposits are also related to post-subduction magmatism (Richards, 2009). The porphyry deposits found in both these settings present similarities in terms of mineralisation and alteration styles but also differences concerning petrogenesis and geochemistry of associated magmas (Shafiei et al., 2009, Richards, 2009, Hou et al., 2011). By comparing the occurrence and composition of magmatic sulfides found in volcanic rocks from different geodynamic settings (which may host porphyry and epithermal deposits, Fig.1), it is possible to ~~trace the chalcophile element evolution in those magmas and~~ investigate the role of magmatic sulfide saturation with respect to the fertility of the ore forming systems (e.g., Park et al., 2019, Blundy et al., 2015, Wilkinson, 2013, Audétat and Simon, 2012, Nadeau et al., 2010, Jenner et al., 2010-).

In order to investigate the magmatic sulfide occurrence in volcanic rocks characterised by post-subduction geodynamic setting, we focus our study on three volcanic areas located in Western Anatolia (Turkey), namely the Konya volcanic belt, the Usak Basin (Elmadag, Itecktepe and Beydagi volcanoes) and the Kula volcanic field (Fig.2). The investigated areas represent a suitable integration of and comparison to the Ecuadorian study (Georgatou et al., 2018) for the following reasons: (i) the wide range of SiO<sub>2</sub> content (43-70 wt%) and alkalinity (from high-K calc-alkaline to shoshonitic and alkaline affinities) characterising the volcanic rocks, (ii) the occurrence of both Cu and Au-rich porphyry, and epithermal-type deposits (Doganbey Cu-porphyry and Inlice Au-epithermal in Konya and Kisladag Au-porphyry in Beydagi) temporally associated with magmatic rocks of

**Commented [AAG2]:** Ch: We have added the host mineral percentages in order to emphasise the importance of magnetite as a sulfide host mineral for the case of Ecuador/syn-subduction.

**Commented [AAG3]:**  
After the comment of Referee#1-Dan Smith:

Co: describes porphyries as being associated with Andean-type subduction, then contrasts post-subduction. I would strike the descriptor "Andean-type". It's too narrow to be correct. There is porphyry-type mineralisation associated with the Laramide orogeny – not exactly analogous to the Andes – and significant deposits elsewhere in the Pacific Rim that are associated with non-Andean, intraoceanic arc settings. I would leave the distinction between syn-subduction and post-subduction.

R: Thank you for the suggestion.

Ch: The descriptor "Andean-type" has been removed and replaced by syn-subduction. In addition as suggested we have used throughout the text the distinction syn- and post-subduction to discriminate the two environments.

these areas, and (iii) the inclusion of the intraplate mafic alkaline volcanic field of Kula which is not associated with any type of mineralisation.

Contrary to the majority of previous studies here (i) we do not focus explicitly on transparent/semi-transparent sulfide host minerals, (ii) we do not work with mineral separates, and (iii) we investigate uncovered sulfides. These three factors allow us to include the study of opaque minerals (e.g. magnetite) as hosts of magmatic sulfides and maintain the textural relations not only between the sulfide, its host mineral and the surrounding minerals but also within the sulfide inclusion itself. Compared to the majority of previous studies, focusing which focused only on uncovered sulfides hosted in transparent/semi-transparent host minerals, by investigating uncovered sulfides we are able to include opaque host minerals (e.g. magnetite, which was a major sulfide host phase for the case of Ecuador: -Georgatou et al., 2018) while maintaining the textural relations not only between the sulfide, its host mineral and the surrounding minerals but also within the sulfide inclusion itself.

## 2. Geology, Magmatism and Mineralisation in Western Anatolia

The geodynamic regime in Western Anatolia switched from a subduction setting during the Upper Cretaceous to a collisional setting in the Late Paleocene, resulting in post-collisional extension in the Eocene (Delibaş et al., 2016, 2017; Rabayrol et al., 2019; see Figure 2-a for the general geodynamic setting). Several volcano (-plutonic) complexes of Mio-Pliocene age occur in NE-SW-trending extensional basins and are post-orogenic extensional in nature. They have been divided into three regions (Fig.2b,c); (i) the Konya region, for which both subduction (Doglioni et al., 2009; Innocenti et al., 2010) and post-subduction (Pe-piper et al., 2001; Dilek and Altunkaynak, 2007) geodynamic regimes have been suggested, is here taken to represent a ~~transitional post-subduction~~ geodynamic regime as supported by recent evidence presented by Rabayrol et al. (2019) (from subduction to post-subduction), (ii) the Usak-Güre Basin, including three volcanic centers (Elmadag, Itecektepe and Beydagi), corresponds to a post-subduction, locally extensional setting (Prelević et al., 2012, Ersoy et al., 2010), and (iii) the Kula volcanic field results from asthenospheric upwelling associated with extension in a post-subduction setting (Tokçaeç et al., 2005, Alici et al., 2002).

### 2.1 Konya

The Konya volcanic belt is located S-SW of the city of Konya (Fig.2b). It is composed of volcanic domes and ignimbrites of Mid-Miocene to Pliocene age (Keller et al., 1977, Temel 2001). The basement includes Permian metamorphic rocks, Triassic limestone and shales, Jurassic ophiolites, radiolarites and limestones, Cretaceous sandstones and quartzites (Temel et al., 1998). The erupted products are andesites to dacites with high-K calc-alkaline affinity. According to K/Ar ages obtained by Keller et al. (1997) a southwestern migration of magmatism is observed with time, starting with the oldest unit, the Sille volcanics (11.45 Ma – 11.9 Ma), located in the northeastern part of the Konya volcanic and ending with the Fasillar and Gevrekli domes, in the SW of the volcanic belt, which show Pliocene ages (3.75 Ma and 3.35 Ma respectively).

The Konya volcanic belt hosts the Miocene Au-epithermal high sulphidation deposit of Inlice (59.600oz1.68t @ 2.36 g/t Au, mining-atlas.com, 2015) located in the Erenkaya dome and the Miocene-Pliocene Doganbey Cu porphyry deposit (drilling of 273.90m @ 0.13g/t Au, Stratex International Plc, 2018), situated in the Karadag-Doganbey dome, both shown in Figure 2b. Two other prospects (Karacaoren and the Oglakci) have been

#### Commented [AAG4]:

After the comment of Referee#2-Jonathan Naden:

C: Why is this threefold approach important?

R: These three factors allow us to include sulfides hosted by magnetite while still maintaining the textural relations.

Ch: We have re-phrased the sentence as seen in order to emphasize the importance of magnetite.

#### Commented [AAG5]: Ch: We have re-phrased and

corrected transitional setting by post-subduction setting adding this recent study (Rabayrol et al., 2019) in line 90. We have also changed the descriptor 'transitional' wherever needed.

#### Commented [AAG6]:

After the comment of Referee#1-Dan Smith:

C: This should be tonnes of ore @ Au g/t

R: Thank you for the observation.

Ch: We have converted from Moz to tonnes.

discovered by Stratex International in the Konya volcanic belt. [For details on the mentioned economic deposits, please see Zürcher et al. \(2015\) for Inlice and Redwood \(2006\) and Hall et al. \(2007\) for Doganbey.](#)

## 2.2. Usak-Güre basin

The Usak-Güre basin, situated 300 km west of the Konya volcanic belt is composed of (i) the Menders Massif, including a metamorphic core composed of metagranites and gneiss (Proterozoic) overlain by Paleozoic schists and Mesozoic marbles and of (ii) the Upper Cretaceous Ophiolitic mélange of the Izmir-Ankara zone including unmetamorphosed ultramafic rocks, radiolarites and altered silicic rocks (Ercan et al., 1978, Cemen et al., 2006).

Syn-extensional sedimentation and volcanism associated with the metamorphic complex of the Menders Massif are recorded in detail within the basin. From Early- to Mid-Miocene the basin contains three sequences: the Hacibekir Group, the Inay Group and the Asartepe formation, represented by volcanic and metamorphic rocks (Cemen et al., 2006, [KaraogluKaraoglu et al., 2010](#)). The Cenozoic volcanism in the Usak-Güre basin occurs in three NE-SW trending belts where the volcanic edifices are aligned. According to the ages obtained by [KaraogluKaraoglu et al. \(2010\)](#) and Seyitoglu (1997) it appears that the volcanism migrated from north to south with time: (i) Elmadag (17.29 Ma), (ii) Itecektepe (15.04 Ma) and (iii) Beydagi (12.15Ma) (see Figure 2c). Volcanic products includes shoshonites, latites and rhyolitic lavas followed by dacitic and andesitic pyroclastic deposits. All three volcanoes are composed of dacitic ignimbrites formed by the collapse of their caldera and overlying lava flows.

Among all the volcanic complexes situated in the Usak-Güre basin only the Beydagi complex is ~~recognised as~~ mineralised hosting the Kisladag Au-porphyry (~~255t~~ @ 0.61 g/t Au and ~~119 t @ 0.4 g/t Au~~ of total indicated ~~and inferred~~ resources, [Baker et al., 2016](#), with cut-off grade 0.3 g/t, [www.eldoradogold.com](#)-last update on 30.9.18 and up to 327 ppm of Mo, Sillitoe, 2002).

## 2.3 Kula volcanic field

The Kula volcanic field is situated west of the Usak province (Fig.2c) and its volcanic products are late Pliocene to late Quaternary in age (Ercan and Oztunali, 1983; Ercan et al., 1983, Richardson-~~Bunbury~~, 1996, Innocenti et al., 2005, Aldanmaz, 2002, Westaway et al., 2004). The rocks include lava flows and tephra deposits of varying mafic alkaline composition (basanite, phonolitic tephrite and trachybasalt). Kula represents an intraplate OIB-like alkali-basaltic volcanic center with an asthenospheric mantle signature and no subduction-related inputs (e.g. Agostini et al., 2007, Alici et al., 2002, ~~TokcaerTokcaer et al., 2005~~).

## 3. Analytical Methods

After a preliminary screening for magmatic sulfides in 108 thin sections from all investigated volcanic centres, a total number of 93 thin polished sections were studied in detail under a petrographic microscope both in transmitted and reflected light (Table S1 in Supplementary 1). Thin sections that had both hydrothermal and magmatic sulfides were excluded from this study due to the difficulty in some cases to distinguish between these two types of sulfides ([see distinguishing criteria in Supplementary 2](#)). For this reason, unless stated otherwise, sulfides referred to herein are always meant to be magmatic sulfides. Microphotographs and identification of mineral phases were obtained using a Scanning Electron Microscope (SEM) JEOL JSM7001F digital with 15kV

### Commented [AAG7]:

After the comment of Referee#1-Dan Smith:

C: These numbers need checking. The resource should be expressed in tonnes or million tonnes, grade in g/t.

R: Thank you for the observation.

Ch: We have corrected the grade and converted to tonnes. We have also added the inferred resources.

accelerating potential and 1 nA absorbed current, at the University of Geneva, Switzerland. Whole-rock samples were analysed for major and minor elements by X-ray fluorescence analysis (XRF) using a PANalytical Axiom AX spectrometer and for trace elements by a Laser Ablation Inductively Coupled Mass Spectrometer (LA-ICPMS Agilent 7700), at the University of Lausanne, Switzerland (Tables 1-3 in doi:10.6084/m9.Figshare.8230787). In situ chemical analysis of sulfides (Table 1) was carried out using a JEOL 8200 Probe Micro-Analyser (EPMA) at the University of Geneva, Switzerland (for complete dataset see Table 4 in doi:10.6084/m9.Figshare.8230787). An iImage analysis software (ImageJ©1.38 software) was used to obtain modal abundances of the phases composing each sulfide in order to reconstruct the bulk (area %) sulfide composition (for complete dataset see Table 5 in doi:10.6084/m9.Figshare.8230787). For details on analytical methods ~~(and their limitations), on whole rock and mineral chemistry~~ see Supplementary 2.

#### 4. Results

##### 4.1. Whole rock geochemistry

The ~~volcanism-volcanic rocks~~ of the studied areas displays a wide range of SiO<sub>2</sub> and alkali element concentrations ranging from basalts to andesites/dacites ~~and from with high-K- calc-alkaline~~ to shoshonitic ~~series-affinity~~ (Fig.3a,b). The Konya volcanic belt is characterised by volcanic products ~~with a high-K calc-alkaline affinity~~ ranging from andesitic to dacitic in composition ~~with a high-K calc-alkaline affinity~~. In the Usak basin, the Elmadag volcanic complex is composed mostly of shoshonitic trachyandesites, the Itektepe volcanic unit is characterised by high-K-~~calc-alkaline~~ rocks, mostly andesitic in composition, and the Beydagi volcanic edifice contains ~~high-K calc-alkaline to shoshonitic~~ rocks ranging from andesites to trachyandesites ~~with high-K calc-alkaline to shoshonitic affinity~~. Finally the Kula Quaternary volcano presents the most alkaline and mafic compositions, ranging from tephrites/basanites to phonotephrites. All rocks present a negative correlation ~~between of TiO<sub>2</sub> and Fe<sub>2</sub>O<sub>3</sub> and with SiO<sub>2</sub>~~, with Kula being more enriched in TiO<sub>2</sub> and Fe<sub>2</sub>O<sub>3</sub> than the rest.

In terms of trace element concentrations all rocks show a decrease of Cu and Ni with increase of SiO<sub>2</sub> (Fig.3e-f), indicating a compatible behaviour of these elements during magmatic evolution. In addition all rocks show an enrichment of LREE relative to HREE with decreasing Nb, Ta, ~~Sr~~ and Ni passing from intraplate volcanism (Kula) to post-subduction (Elmadag, Itektepe, Beydagi, ~~Konya~~), ~~and finally to a transitional subduction to post-subduction regime (Konya)~~.

##### 4.2. Sample petrography

All studied samples are volcanic rocks with porphyritic textures. Phenocrysts are usually plagioclase, amphibole, pyroxene (mostly clinopyroxene) and, depending on the volcanic centre, olivine, biotite and to a lesser extent Fe-Ti oxides (mostly Ti-magnetite). The matrix is aphanitic, mostly composed of microlitic plagioclase (<1 mm) and sometimes amphibole and pyroxene microcrystals. Apatite and anhydrite can also be found as inclusions in pyroxene and Fe-Ti oxide phenocrysts.

##### 4.3. Sulfide petrography and chemistry

Rocks of all study areas contain magmatic sulfides, ~~h~~ However, depending on the volcanic centre, sulfides are present in variable amounts, size, shape and composition. A comparison of the sulfide occurrences ~~between among~~

**Commented [AAG8]:** Ch: We have added a section in the end of the Supplementary 2 dedicated to the limitations of the method and the approach.

**Commented [AAG9]:**  
After the comment of Referee#1-Dan Smith:

C: Sr is a bit more subtle than just a decrease though - the Sr "anomaly" actually increases from Kula to Konya - although there's less, there is actually more than expected (based on the slope between neighbouring elements). The statement isn't wrong, but I don't think the decreasing Sr should really be listed as a defining feature. In a number of post-subduction suites worldwide, anomalously high Sr is a notable feature (as mentioned in intro for Ecuador).

R: We agree with the comment.

Ch: We have deleted Sr from the sentence.

185 the different volcanic centers (corresponding also to different geodynamic settings) is given in Figure 4. In all  
studied samples sulfides occur inside phenocrysts and not in the groundmass (Fig.5), with the exception of the  
Kula volcano that presents sulfides also as aggregates with oxides and micro-sized silicates in the groundmass  
(Figs.4e,ii,5e) and a few cases in Beydagi (Fig.4xi). The main host phenocryst for sulfides is magnetite for Konya  
and Beydagi (42% and 31% respectively), amphibole for Itecektepe and Kula (85% and 39%), and pyroxene for  
190 Elmadag (87%). Sulfides are also hosted in plagioclase (Fig.5b). The common occurrence of  
voids/~~vesicles~~bubbles in contact with the sulfide phases is noteworthy (e.g. Figs. 4ii, 5g).

Based on petrographic observations and SEM mineral analysis we distinguished six main types of magmatic  
sulfides: 1) Type-1 sulfides containing two to three distinct phases, namely a Cu-poor and Ni-rich phase  
(pyrrhotite), a Ni-rich phase (pentlandite), and rarely a Cu-rich phase (cubanite) (Fig.4a); 2) Type-2 sulfides  
195 containing two to four distinct phases, namely a Cu-poor (pyrrhotite), one/two Cu-rich (chalcopyrite  $\pm$  cubanite)  
and sometimes a Ni-rich (pentlandite) phase (Fig.4b); 3) Type-3 sulfides containing a Cu-rich phase (chalcopyrite  
or chalcocite) and an Fe-rich phase (pyrite/Fig.4c); 4) Type-4 sulfides containing only Cu-rich phase/s  
(chalcopyrite,  $\pm$  cubanite,  $\pm$  bornite), occasionally in contact with anhydrite (Fig.4d); and 5) Type-5 sulfides  
containing aggregates of a Cu-poor and Ni-rich (pyrrhotite) sulfide phase and one or more Al-rich oxide phases  
200 (magnetite, magnetite/ilmenite and secondary goethite) (Fig.4e). Finally Type-6 sulfides, the so-called “daughter  
sulfides” (e.g., Savelyev et al., 2018, Fig.5h), were only observed in three cases in this study, within olivine  
phenocrysts of rocks from Kula. From SEM analysis this latter sulfide type it is composed only ~~out~~ of pyrrhotite  
 $\pm$  pentlandite, however due to their small size ( $<0.5 \mu\text{m}$ ) they ~~were-could~~ not ~~be~~ analysed with the EPMA.

Type-1 sulfides are only hosted by olivine, they are generally small ( $<30 \mu\text{m}$ ), round and show pentlandite  
205 exsolution flames in pyrrhotite (Fig.4i). Type-2 sulfides, the most common, are hosted by different phenocrysts  
(pyroxene, amphibole, magnetite and plagioclase), presenting a range of sizes (up to  $70 \mu\text{m}$ ) and having mostly  
ellipsoidal to rounded shape (Fig.4ii-vii). The pentlandite phase in this sulfide type can occur either as an  
exsolution in the pyrrhotite and/or as an individual phase inside the Ni-rich pyrrhotite (Fig.4vi), whereas cubanite  
is mostly present when the sulfide is hosted in amphibole, forming complex exsolution textures with chalcopyrite  
210 and presenting irregular rounded-resorbed shapes (Fig.5d). Type-3 and -4 sulfides are only hosted by magnetite  
phenocrysts occurring in smaller sizes ( $<30 \mu\text{m}$  and  $<20 \mu\text{m}$ ) and presenting ellipsoidal and angular shapes,  
respectively (Fig.4viii,ix,x). Type-4 sulfides ~~in particular~~ have been observed in some cases in contact with  
anhydrite and with zircon inclusions (usually  $<20 \mu\text{m}$ ) all hosted by the same magnetite crystal (Fig.6). Finally  
Type-5 consists of sulfide aggregates with variable size (up to  $600 \mu\text{m}$ ), which may carry rounded oxide inclusions  
215 and sometimes are in sharp contact with surrounding silicate phases (Figs.4xi,xii,5e). Although all study areas  
present Type-2 sulfides, from the volcanic centers situated in the Usak basin, only Beydagi shows sulfide Type-3  
and -5, whereas only Kula and Konya present sulfide Type-1 and -4, respectively.

Electron microprobe analysis: ~~corresponding to of single mineral phases analysis composing a multi-phase sulfide~~  
inclusion; confirms the above petrographic observations and SEM analysis. Sulfides belonging to Konya and to  
220 the volcanic areas of the Usak-Güre basin (Beydagi, Elmadag and Itecektepe) have compositions typical of the  
Cu-Fe-S system whereas sulfides observed in Kula (intraplate OIB-like volcanism) extend into the Cu-Fe-Ni  
system as well (Fig.7a,b). Sulfides from all areas present a range of compositions between pyrrhotite and cubanite-  
chalcopyrite (Type-2 and -5) hosted by different phenocrysts (mostly amphibole, pyroxene and magnetite, Fig.7a).

**Commented [AAG10]:**

After the comment of Referee#1-Dan Smith:

C: A simple table would better summarise the inclusions types, their mineral hosts, and the volcanic centre hosts (and their classification with regards to syn-/ post-subduction). Perhaps expand fig 4?

R: Thank you for the recommendation.

Ch: We have expanded figure 4, which now besides the study area, the sulfide type with their mineral host also depicts the geodynamic setting at the top.

225 Beydagi shows additional compositions between chalcopyrite (sometimes chalcocite) and close or equal to  
magmatic pyrite (Type-3) and Konya presents sulfides ranging from chalcopyrite to bornite compositions (Type-  
4). The latter types are only hosted by magnetite. In the case of Kula ~~a number of sulfides~~ (Type-1 and some Type-  
2) ~~sulfides~~ are Ni-rich, ranging from pyrrhotite to pentlandite (Fig.7b). ~~A general decrease in the sulfide Ni/Cu~~  
~~ratio versus Fe/S ratio can be noted switching from Ni-rich sulfide phases (pentlandite) hosted by olivine to Cu-~~  
~~rich (bornite) hosted by magnetite (Fig.7c).~~

230 EPMA sulfide compositions often correspond to variable nonstoichiometric atomic ratios of major components  
different from the typical expected base metal composition of the sulfide phase observed, resulting into  
intermediate values characteristic of a solid solution mostly between two end members (e.g. cubanite and  
chalcopyrite and bornite; Figs.6, 7). In addition in some cases sulfides are characterised by a sulphur deficiency,  
which, according to previous studies, may be a result of the replacement of sulphur by oxygen that is not directly  
235 measured by EPMA (e.g. Larocque et al., 2000, Keith et al., 1997). These latter cases show usually lower totals  
than those resulting from Cu-rich Type-4 sulfide analysis (see Table 4 in doi:10.6084/m9.Figshare.8230787).

A sulfide comparison for each area in terms of Cu and Ni contents, determined by EPMA, is shown in Figure 8.  
Konya presents the most Cu-rich sulfides (Type-4, Cu median= 56 wt %) and Kula the most Ni-rich sulfides  
(Type-1, Ni median = 4.2 wt %). In the Usak basin Beydagi shows the most Cu-rich sulfides (Type-3, Cu median=  
240 32 wt %), followed by Elmadag (Type-2, Cu median= 0.14 wt %) and then by Itecektepe (Type-2, Cu median=  
0.03 wt %). In addition to Cu, Fe, Ni and S, sulfides were also analysed for As, Se, Zn, Ag and Au (see Table C.1  
for determination limits.). For all locations As and Se are generally lower than 0.1 wt %. Zn concentrations were  
obtained only for Konya and Kula, showing, for Type-2 sulfides, Zn median= 0.03 and 0.04 wt%, respectively.  
Out of 503 Ag and 196 Au sulfide measurements obtained, only 82 and 31 values, respectively, resulted in  
245 concentrations above detection/determination limit. Ag varies between 0.01-0.07 wt % with a maximum amount  
of 0.11 wt % (in Konya) whereas Au is higher showing higher values in the Usak-Güre basin (Au median=0.14-  
0.24 wt %) compared to the rest (Au median=0.04-0.05 wt %). These unusually high sporadic values of Ag and  
Au have been attributed by previous studies to clustering and nugget effects of noble metals (e.g. Savelyev et al.,  
2018, Zelenski et al., 2017, Holwell et al., 2015, Holwell and McDonald, 2010). A possible Au nugget occurrence  
250 is shown in Figure 4viii for Type-3 sulfides of Beydagi. Although the phase is too small (<0.5 µm) to obtain  
quantitative values by EPMA, detectable Au was measured by SEM near and on this high reflectance micro-  
phase.

Since ~~all~~ sulfide ~~inclusions of all~~ types are composed ~~of by~~ more than one mineral phase ~~(e.g., pyrrhotite and~~  
~~chalcopyrite) and therefore a single sulfide may correspond to more than one EPMA value~~, the sulfide composition  
255 data ~~has been~~are presented ~~here and discussed~~ in two different ways: (a) as individual microprobe measurements  
~~of mineral phases within~~for each ~~multi-phase~~ sulfide type ~~observed in from~~ the different study areas (Table 1,  
Figs.7,8) and (b) as ~~reconstructed~~-bulk compositions of the sulfide ~~inclusion reconstructed~~ by considering the  
modal abundance (area %) and the EPMA concentrations for each phase composing the ~~multi-phase~~ sulfide (see  
Table 2, Figs. 9,10 ~~and examples of the reconstruction methods in Supplementary 2~~).

260 Calculating the area % ~~in-occupied plan-view of by~~ each mineral composing the sulfide ~~in the 2-dimension space~~  
(and therefore the mss/iss initial proportions) allows us to ~~get-obtain~~ an indirect ~~qualitativequantitative~~ information

**Commented [AAG11]:**

After the comment of Referee#2-Jonathan Naden:

C: How much of this compositional variability is due to the analysis of multiple phases? E.g., the electron beam excites a phase beneath the surface being analysed. For example, in Fig 4x it would be very difficult to analyse bornite without incorporating some signal from chalcopyrite.

R: Thank you for the observation. In terms of our use of the analytical precision of the EPMA please see our comment Supplementary 2.



on the initial metal ~~contents~~budget of the silicate melt from which the sulfide melt was exsolved in the different study areas. ~~This is because the areas characterising the mss and iss phases are proportional to the metal amounts that have partitioned into these phases. Although, due to cut effects, crystal orientation and other limitations of this method (see Supplementary 2),~~ Whereasne could question that this approach may yield biased results ~~(because of cut effects and crystal orientation), but due to cut effects, crystal orientation and other limitations of this method (see Supplementary 2),~~ averaged out over a large number of sulfide ~~inclusions~~ we think we obtain a significant first-order estimate. The mean proportions of mss and iss in area% are shown with the box plot of Figure 9 and in Table 2. The mss area % ( $=\text{mss}/(\text{mss}+\text{iss})\times 100$ ) and the 2 standard error for each study area are as follows: Kula (82.0 $\pm$ 7.4 %), Itecektepe (84.8 $\pm$ 4.9 %), Elmadag (86.9 $\pm$ 4.8 %), Beydagi (86.9 $\pm$ 3.2 %), Konya (88.1 $\pm$ 2.6 %). A reconstruction of the bulk mss and iss in area (%) composition of the sulfides was realised in this study also for the case of Ecuador for comparative purposes, resulting in mss area% of 82.0 $\pm$ 4.8. When ~~considered all together~~ (Type-2 sulfides from all investigated areas), for a total of ~~126+100~~ sulfides ~~are considered together~~, all study areas present similar proportions of Fe-rich/mss (84.2%) and Cu-rich/iss (15.7%) phases within error (2se =  $\pm$  2.2).

## 5. Discussion

### 5.1. Sulfide melt evolution

The evolution of sulfide melt has been studied through experiments considering the sulfide globules as closed systems that differentiate with decreasing T (e.g. Kullerud et al., 1969, Calibri, 1973, Naldrett and Gasparini, 1971, Cabri, 1973, Craig and Scott, 1974, Tsujimura and Kitakaze, 2004, Holwell and McDonald, 2010, Naldrett, 2013 and references therein). Nonetheless, there is a difficulty to correlate the different phase stability fields for the complete range of temperatures, i.e., 1200-100°C. This is due to the fact that the Fe-Ni-Cu-S system is a complex system characterised by a number of solid solutions and unquenched phases. In addition, the mineral assemblage composing the sulfides depends, among other factors ( $f\text{O}_2$  and  $f\text{S}_2$ ), on the initial metal budget of the silicate melt, and therefore on the metal contents of the exsolving sulfide melt, as well as on the P and T conditions under which this melt solidifies. A compilation of isothermal sections of the Cu-Fe-S system resulting from a number of experimental studies realised at different temperatures is presented in Figure 10. For this study it is important to note at which approximate temperature intervals mineral phases can coexist and therefore a summary of the experimental findings, only focused on the mineral phases observed in this study, ~~has been added~~is presented below.

The general agreement is that above 1200°C the system is composed of ~~two immiscible liquids~~, a metal (Cu, Au)-rich liquid and a sulphur (+Fe, Ni)-rich liquid (Craig and Kullerud, 1969). An Fe, Ni-rich/Cu-poor monosulfide solid solution (mss) and a Cu, Au-rich/Ni-poor intermediate solid solution (iss) exsolve around 1192°C (Jensen, 1942) and 960°C (Kullerud et al., 1969), respectively (Fig.10a-b and 10c). The pair mss-iss is stable only starting from 935°C and until 590°C (Fig.10c-e), below which temperature these two phases cannot coexist. Around 930°C a high temperature-bornite solid solution (bnss-h) and iss become stable (Fig.10c). With further cooling ( $\sim$ 610°C, Fig.10e) the mss converts to pyrrhotite (po), through exsolution of a high temperature pentlandite (pn-h) (e.g. Stone et al., 1989). Subsequently at 590°C the iss unmixes into chalcopyrite (cp) and cubanite (cb) (Fig.10f, e.g. Yund and Kullerud, 1966). Pyrite (py) appears at 743°C and becomes stable with iss at 739°C and with cp at 600°C (Fig.10e). The pair cp-py coexists until at least 200°C (Craig and Scott, 1974). A low temperature

**Commented [AAG12]:** Ch: The value '100' has been corrected since the total number of Type-2 sulfides that have been processed by ImageJ is 126 as shown also in Table 5 of Supplementary 2. The number 100 corresponds to all sulfides of all types for which a bulk area reconstruction method combining these mss and iss relative proportions and the EPMA wt% compositions.



300 pentlandite (pn) appears at 610°C and becomes stable with cp at 572°C. Finally the bnss-h breaks down to chalcocite (cc) and digenite (dg)-bnss pair at 430°C (Fig.10g). At 334°C pyrrhotite becomes stable with chalcopyrite and with further cooling at 330°C the digenite-bnss pair breaks down to digenite and bornite (bn, Fig.10g-h).

305 Two main stages of sulfide evolution were observed in this study confirming the experimental temperature range windows, for specific mineral pairs, as well as conclusions from previous research ~~by~~ (Hattori, 1999, Parat et al., 2011, Du et al., 2014, Agangi et al., 2016). The first stage accounts for the more primitive sulfide types (Type-1 and -2) including mss-rich±iss and mss+iss sulfide melt, now represented by compositions (shown from both individual mineral analysis-Fig.7 and reconstructed area compositions-Fig.10) close to pyrrhotite (±pentlandite, cubanite) and pyrrhotite + chalcopyrite (±cubanite), respectively. Their shape (round-ellipsoidal) and host mineral  
310 (olivine for Type-1 and, amphibole, pyroxene, plagioclase and magnetite for Type-2) confirm their origin as Fe-Ni (±Cu) - rich sulfide melts. The second stage consists of Type 4 sulfides, characterised by iss-only and a Cu-rich sulfide liquid (as all the Ni has been exhausted), which now comprises chalcopyrite and bornite (±digenite). This sulfide type occurs only within Fe-oxides, mostly in Ti-rich magnetite with displaying occasional ilmenite exsolution lamellae. Their angular shape indicates that the solution was trapped initially as a Cu-rich liquid (Chang and Audétat, 2018) which solidified into an iss following the host mineral crystallisation planes and later unmixed (see also Georgatou et al., 2018, Holwell et al., 2015). In addition to the relatively low temperature ranges compared to the first stage sulfides (<330°C, see Fig.10), other petrographic and compositional arguments for considering this as a later stage are the following: (i) the unique occurrence in magnetite, a late crystallising mineral relative to olivine and pyroxene (hosting the first stage sulfide Type-1 and -2) and (ii) the more common  
315 occurrence of voids/vesicles around the Cu-rich sulfides accounting for higher mean portions of the inclusions (up to 23 area %, see tables 2.C.2) compared to Type-2 sulfides (<10 area%). The contact between each sulfide inclusion and these vesicles is smooth, indicating these voids could account for the presence of a pre-existing fluid phase which exsolved from the silicate melt before entrapment in the magnetite crystal (Table 2).

325 Sulfide Type-3 and -5 are more difficult to interpret. Type-3 presents both ellipsoidal and rectangular shapes indicating entrapment as a liquid/~~melt~~. The temperature range that corresponds to the mineral assemblage of chalcopyrite (±chalcocite) + pyrite is 600-200°C, suggesting a later timing than the first stage sulfides. Finally Type-5 sulfide aggregates are similar to the first stage sulfides (Type-2) and seem to have originated from an mss and Fe-rich system, producing immiscibility textures of the rounded oxide inclusions into the pyrrhotite, which have later aggregated with silicates.

330 In this study, no early and late sulfides co-hosted by the same mineral were observed. This suggests two distinct sulfide saturation stages, where the system has to ~~first~~ undergo magnetite crystallisation to reach the second stage. However, it is still not clear whether these stages are indeed distinct and independent one ~~to of another~~ other, or if they may directly follow one another, through a continuous process of sulfide saturation, whose products change chemistry due to the chemical evolution of the melt. Nonetheless, according to the sulfide types  
335 observed in these two stages, the Ni/Cu (proxy for mss/iss) decreases with magmatic evolution (Fig.7c), starting from an mss-rich sulfide melt (Type-1), followed by an mss and iss-melt (Type-2 and -5) and finally (and uniquely for some settings) by iss-rich/iss-only sulfides (Type-3 and -4). Although, this decrease in Ni/Cu has been noted previously by other researchers (e.g. Hattori, 1999, Du et al., 2014, Keith et al., 2017, Savelyev et al., 2018) for

the early sulfides, until now, there has not been a systematic study on the later stage, iss-only sulfides. The reason for this is most likely the fact that the majority of past studies on sulfides have focussed on silicate mineral separates, in order to be able to locate and analyse the bulk chemistry of entrapped sulfides. This not only prevents necessary observations on textural mineral relations but also the study of non-transparent/opaque minerals, which, as it was shown here, host the Cu-rich and iss-only sulfides.

## 5.2. Sulfide-Textural and compositional comparison of sulfides within Western Anatolia study areas

Volcanic rocks from all study areas contain sulfides and therefore have reached magmatic sulfide saturation at some stage during the lifespan of the magmatic system; however, there are significant textural and compositional differences, which are described below.

### 5.2.1. Kula volcanic field

In Kula, where rocks correspond to more primitive compositions (tephrites/basanites to phonotephrites), we observe sulfide types (Type-1, -2 and -5) representing the most primary Ni-rich and Cu-poor magmatic products resulting from an initial, mostly mss-rich sulfide melt exsolving from a silicate melt. These sulfide types are similar to those found in MORBs (e.g. Patten et al., 2012, Keith et al., 2017, Savelyev et al., 2018 and references therein) and represent only the first stage of sulfide saturation. From textural evidence, e.g., decompression rims in amphibole (Fig.5c), complex textures of cubanite-chalcopyrite resulting from rapid unmixing of iss due to temperature drop (Fig.5d, Type-3) as well as the intact sulfide aggregates found in the groundmass (Fig.5e, Type-6), the magma in Kula seems to have ascended rapidly from depth (e.g. Tokcaer et al., 2005). This implies a short residence time in the crust, which in turn explains the minimum crustal contamination (e.g. Dilek and Altunkaynak, 2007, Alici et al., 2002) and the mafic rock composition.

### 5.2.2. Konya

For the case of Konya, which products range from andesites to dacites, the sulfide types found (Type-2 and -4) represent both stages of sulfide saturation and are less primitive than the ones seen in Kula, with little or no pentlandite present and always a Cu-rich phase (chalcopyrite±bornite). This suggests that the mss and iss-rich sulfide melt started exsolving from the silicate melt at a later stage of magmatic evolution, when the melt was already depleted in Ni and had already a higher amount of iss available, compared to Kula. In fact, Type-4 iss-only sulfide melt of Konya (representing the second/late stage of sulfide saturation) of Konya has sequestered Cu more successfully than at any other location investigated.

Konya is the unique example in this study presenting anhydrite inclusions in contact with a sulfide phase or hosted by the same magnetite phenocryst as the sulfide inclusion (Fig.6). The occurrence of anhydrite either in contact or along with Cu-rich sulfide phases, has been mentioned in the past (e.g., Hattori, 1993, Audétat and Pettke, 2006) and has been suggested to indicate a rapid drop of  $fO_2$  of the system from the sulphate ( $>NNO+1$ ) to the sulfide stability field ( $<NNO$ ) allowing the magma to contain both reduced and oxidized forms of sulphur (Wilke et al., 2011). From experimental constraints for a water saturated system at 150-400 MPa and 1 wt% S added, anhydrite can coexist with pyrrhotite for  $fO_2 = NNO+1$  at 700°C, for  $fO_2 = NNO+1.5$  at 800°C and for  $fO_2 = NNO+2.5$  at 950°C (Parat et al. 2011 and references therein). Therefore, the occasional occurrence of anhydrite in this second stage sulfides (Type-4), would indicate higher temperatures. In addition, the co-existence of sulfide

inclusions, anhydrite, apatite and silicate melt within the same magnetite crystal, would also indicate higher temperatures and a rather magmatic origin of those sulfides. However, in this study the sulfide mineral phases with which anhydrite coexists are Cu-richer/S-poorer (chalcopyrite+bornite±digenite) than pyrrhotite, and are stable at higher fO<sub>2</sub> conditions and lower T. In addition, the system is not expected to be already water saturated since we would expect for that the metals to partition into the fluid phase in such a case and resulting result in hydrothermal and not rather than magmatic sulfides sulphides, and therefore, the temperature ranges in which anhydrite will be stable can differ.

### 5.2.3. Usak-Güre Basin

Beydagi shows slightly more enriched (though similar within error) Cu values in Type-2 sulfide (Cu median= 0.3 wt %) than Elmadag (Cu median= 0.14 wt %) and Iteckepe (Cu median= 0.03 wt %). Additionally, the area (%) of the Cu-phases/iss of Type-2 sulfides found in Elmadag (17.2±4.8), Iteckepe (14.7±4.9) and Beydagi (13.1±3.2) is similar. However, although in terms of bulk chemistry there are not major differences between the three volcanic centers (mostly andesites to trachyandesites), Beydagi is the only volcanic center within the Usak basin which is characterised by two other sulfide types (Type-3 and -5), and at the same is the only mineralised volcanic center. Implications regarding the ore fertility of these systems will be discussed in the following section. Relative to the other investigated areas of Western Anatolia, sulfides in Beydagi show no pentlandite but present in some cases present chalcopyrite (±chalcocite) coexisting with pyrite. This suggests that the iss-rich exsolving sulfide melt was Cu-rich relative to Kula but Cu-depleted relative to Konya.

### 5.3. Comparison of sulfide textures and compositions with-between Western Anatolia systems and Ecuador

Various Miocene large Cu-Mo±Au porphyry deposits (e.g., Junin/Llurimagua Cu–Mo deposit and the Cascabel Cu–Au rich deposit) occur in the frontal arc of Ecuador. Available data on whole rocks indicate that mineralisation is spatially and temporally associated with high Sr/Y porphyritic stocks (Schütte et al., 2012). Investigation of these rocks under a reflected petrographic microscope confirmed previous observations from Schütte et al. (2012) that the rocks contain abundant hydrothermal sulfides, rendering these samples inadequate for the scope of the present study. For this reason, Georgatou et al. (2018) have investigated fresh volcanic rocks from the Quaternary arc of Ecuador. These are intermediate to felsic calc-alkaline magmatic rocks with high Sr/Y values erupted through a crust with a thickness ranging from 50 to 70 km (Feininger and Seguin, 1983, Guillier et al., 2001). Such features are similar to those of magmatic systems typically associated with large porphyry Cu deposits (Loucks, 2014, Chiaradia and Caricchi, 2017) and the temporal and spatial proximity of Miocene deposits to the Quaternary arc rocks investigated lend support to the possibility that processes leading to the formation of porphyry-type deposits under the Quaternary arc of Ecuador could be currently ongoing. Therefore, the Quaternary arc rocks of Ecuador can be used as a proxy of a potentially fertile typical Andean-syn-subduction-related magmatic environment.

In the barren Quaternary volcanics, Georgatou et al. (2018) observed that magmatic sulfides occurred in all studied rocks (from basalt to dacite) of the volcanic arc as polyminerale inclusions composed of Fe-rich/Cu-poor and/or Cu-rich phases, occurring mostly in Fe/Ti oxides and to a lesser extent in silicate minerals. Only sulfide Type-2 and 4 were observed in Ecuador, presenting a remarkable textural and compositional resemblance to the case of

**Commented [AAG13]:** After the comment of Referee#1-Dan Smith:

C: Konya anhydrite inclusions – possibility of water saturation dismissed – why? On what basis? Some of the Konya samples are evolved compositions (dacites) and water saturation is entirely feasible. Sulphur speciation and hence mineral stability is also modified by pressure (see Matjushkin et al 2016).

R: These Type-4 sulfides apart from the anhydrite they also co-exist with apatite and silicate melt inclusions in magnetite which indicates their magmatic nature. If the system was already water saturated we would expect to see hydrothermal sulfides.

Please see our extended reply at the response pdf doc entitled "Response to Referee#1-Dan Smith".

Ch: We have explained the statement by adding the above arguments as seen in the text.

Konya. ~~B~~Rocks from both areas are characterised from both, display first (Type-1 ad -2) and second stage (Type -4) sulfide saturation. Nonetheless, Type 4 sulfides in Konya have sequestered higher amounts of Cu compared to Ecuador. In particular according to EPMA individual mineral analyses of 19 sulfides in Konya and 22 in Ecuador, Cu<sub>max</sub> ranges between 72 and 66 wt %, respectively.

Georgatou et al. (2018) suggested that the negative trend of Cu with magmatic differentiation (e.g., Keith et al., 1997, Chiaradia, 2014) observed in typical ~~syn-subduction~~Andean-type magmatic arcs is a result of a continuous Cu sequestration in magmatic sulfides. A similar Cu decrease with magmatic evolution is observed also in the areas studied here and characterised by post-subduction magmatic rocks some of which are also associated with porphyry and epithermal-type deposits. This suggests that in both settings (~~syn~~-subduction and post-subduction) Cu and other chalcophile metals behave compatibly during magmatic evolution and confirms that these metals are lost on the way to the surface ~~within the continental crust~~.

~~In contrast to Ecuador, the volcanic provinces of Konya and Beydagi are associated with coeval economic deposits. In particular, the Beydagi volcanic center was active from ~16 to 12 Ma and hosts the ~14 Ma Kisladag Au porphyry, whereas the Konya Volcanic Belt is characterised by more or less continuous magmatism between ~12 and 3.3 Ma and hosts the ~7.2 Ma old Doganbey Cu-porphyry (Zürcher et al., 2015) and the Miocene Inlice Au-epithermal deposit (Redwood, 2006, Hall et al., 2007).~~

## 6. Implications for ore formation

~~Konya, Beydagi (Usak basin) and Ecuador are the only areas among those studied, which are associated or potentially associated with economic deposits of the porphyry suite. It is remarkable noteworthy that this feature coincides with the fact that rocks from these areas are the only ones with iss-only (Type 4) and iss-rich (Type 3) sulfides. In particular, Type 4 sulfides (chalcopyrite-bornite+digenite) were observed in areas associated (Konya) or potentially associated (Ecuador) porphyry Cu deposits (e.g. Konya-Doganbey and Ecuador-Casabell/Llurimagua Junin). Beydagi, where Type 3 sulfides (chalcopyrite-pyrite) are seen, is associated with a porphyry Au deposit (Kisladag). The above observation calls for further investigation since the presence of iss-rich and iss-only sulfide types, like in cases 3 and 4, could be used as a proxy for porphyry Cu and porphyry Au type deposits, respectively.~~

Some of the most discussed ~~contributing factors to the fertility of a magmatic system and its potential fertility issues of magmatic systems~~ to produce a porphyry deposit on the surface, involve: (i) metal and volatile contents in the primary magma (e.g. Core et al. 2006;-) fertility, in terms of initial chalcophile and siderophile element concentration, and (ii) metal and volatile element content changes during evolution of the primitive magma to the intermediate-felsic compositions typically associated with porphyry-type deposits (e.g. Richards and Kerrich, 2007)s which is linked to increased water amount in the magma, (iii) magma volume and duration of magmatic-hydrothermal activity (e.g. Chiaradia and Caricchi, 2017), and (iv) later enrichment of the system in chalcophile elements by efficiency of pre-concentration processes of chalcophile and siderophile elements in sulfide-rich zones (e.g. Nadeau et al., 2010).

Fertility issues (iii) and (iv) above have been addressed by various studies. Cline and Bodnar (1991) and more recently Chiaradia and Caricchi (2017) and Chelle-Michou et al. (2017) have shown that there is a correlation

### Commented [AAG14]:

After the comment of Referee#1-Dan Smith:

C: This content is covered in the background sections. I think you can cut this paragraph.

Ch: We have removed the indicated paragraph.

Commented [AAG15]: After the comments of Referee#1-Dan Smith, suggesting to include the importance of evolved lithologies and to discuss total metal abundances and magma volumes as contributing factors for ore genesis.

Ch: We have moved this part further below and have re-structured and re-phrased all the chapter on 'implications for ore formation'.

between the size of the magma reservoir providing metals and fluids to the ore system and the size of the deposit and that also the duration of the ore process might play a role in this sense.

Sulfide pre-concentration in cumulates at depth and a later magmatic recycling through remelting and release of the metals back to the system has been suggested as a possibility by various studies (e.g. Richards, 2009, Lee et al., 2012, Audétat and Simon, 2012, Sillitoe, 2012, Wilkinson, 2013, Chiaradia, 2014, Jenner, 2017, Fontboté et al., 2017). Although we cannot test this hypothesis in the present study, it is possible that the sulphide-silicate-oxide aggregates observed in Kula (Figs. 4xi, 5e) account for those cumulates. However, further investigation to quantify the physico-chemical conditions under which this recycling process may be possible or not is needed.

Below we discuss the fertility issues (i) and (ii) above in the light of our data. For source fertility to play an important role for the ore genesis in terms of metal budget, it would imply an obvious difference in the Cu amount of the sulfides saturating during the first stage as well as different proportions of mss (Cu-poor) and iss (Cu-rich) composing the most primitive sulfides (Type-2) for the different study areas. This would be a result of different metal abundances in the initial silicate melt that would preferentially partition into either the iss (eg. Cu, Au) or the mss (eg. Ni, Fe), respectively. For example, the average area (%) of the Cu-rich/iss phases in sulphide inclusions from Beydagi, Konya and Ecuador, relative to the mss phases composing the same sulfide inclusions, should be larger compared to the area (%) of the iss phases in sulphide inclusions of Kula, Itecektepe and Elmadag. This goes against the results found in this study where inclusions from all regions show similar relative proportions (84.2 and 15.7 (2 standard error =  $\pm 2.2$  area %) of Ni-rich/mss and Cu-rich/iss phases. These values are very similar to the mss-iss proportions of sulfides found in Merapi volcano (mss =  $81 \pm 7$  and iss =  $19 \pm 7$ , respectively; Nadeau et al., 2010). Also according to the study carried out by Chang and Audétat (2018), on arc magmas of Santa Rita and Cherillos (New Mexico) using LA-ICP-MS, the more Cu-rich/iss mineral phases are  $<20$  vol% relative to the Cu-poor/mss. A second argument that supports the contention of similar metal contents in the primitive magmas is that there are no significant differences in the Cu values of Type-2 sulfides neither for the individual EPMA analysis (Cu median = 0.03–1.3 wt %, Tab.1 and Fig.8) nor for the bulk area reconstructed compositions (Cu median = 0.69–6.04 wt %, Tab.2) –among the areas that present iss-only sulfides and are associated with porphyry deposits. All study areas are characterised by similar Cu amount (Cu median = 0.03–1.3 wt %) and proportions (area %) of Ni-rich/mss (84.2) and Cu-rich/iss (15.7) phases within uncertainty (2se =  $\pm 2.2$ ). This observation carries major implications suggesting that independent of the geodynamic setting (subduction, post-subduction and intraplate-OIB like volcanism) the initial metal abundances of the primitive magmas are approximately the same (see also Lee et al., 2012 for similar Cu contents in primitive arc basalts and MORBs).

Concerning the amount of water in the source, it is possible that different water contents of the primitive magmas corresponding to different geodynamic settings may play an important role for both sulfide saturation at depth and ore generation. It is likely that all magmatic systems have the potential to become saturated in Cu-rich/iss-only sulphides, after exhausting all the Ni, as long as there is not enough water to strip out the metals from the melt, rendering a residual magma fertile, leading to the formation of a porphyry deposit. Because H<sub>2</sub>O is incompatible, magma evolution from a primitive basaltic magma will result in increasing concentrations of H<sub>2</sub>O in the residual derivative magmas of intermediate to felsic composition until water saturation may be reached depending mostly on the depth at which magma evolution occurs at surface (e.g. Kelley and Cottrell, 2009, Richards, 2011, Yang et

**Commented [AAG16]:** After the comment of Referee#2-Jonathan Naden:

C: If you can't "test the hypothesis in the present study" then it shouldn't be discussed as it is speculation. Please remove this paragraph and any subsequent discussion that is based on it.

R: We consider important to still mention the hypothesis of sulfide pre-concentration in cumulates as it has been suggested by a number of co-authors (see references). In fact there are currently experimental studies investigating this process (e.g. Virtanen et al., 2019, Goldschmidt presentation).

Ch: We have deleted the sentence regarding the aggregates seen in Kula as requested.

**Commented [AAG17]:**  
After recommendation of Referee#1-Dan Smith

We have rephrased this paragraph in order to state clearer the main result (relative proportions of mss and iss from Imaje) on which we are basing our argument that similar initial metal contents of the different areas/magmas are observed.

**Commented [AAG18]:**  
After recommendation of Referee#1-Dan Smith

C: This needs rephrasing. It reads as if magmas with insufficient water to strip metals are infertile - when logically, that cannot be correct. A porphyry deposit is a hydrothermal feature - the stripping of metals by a fluid is a vital part of the process. A magma with insufficient water will be copper rich yet still infertile.

R: Thank you for noticing.  
Ch: We have re-phrased as requested.

al., 2015). It is likely that all magmatic systems have the potential to become saturated in Cu-rich/iss-only sulfides, after exhausting all the Ni, as long as ~~the system does evolve to intermediate-felsic compositions while still not reaching water saturation conditions before sulphide saturation occurs.~~ Based on the textural and chemical evidence from ~~Type-4 sulfides of Konya, and in particular the co-existence of vesicles indicating a pre-existing gas phase in contact with Type-4 sulfides, here~~ we may be able to trace the transition from a sulfide-saturated system to a fluid-saturated system. ~~Indeed only the rather primitive rocks from Kula did not evolve enough in order to reach the second saturation stage. In addition, in this study, only areas that are characterised by a subduction component, and therefore by likely higher water contents in their source, resulted in displaying a Cu-rich sulfide saturation, with the counterexample of the intraplate OIB-like volcanism of Kula.~~

An additional important factor in order to saturate sulfide Cu-rich phases is magnetite crystallisation. Although it has already been pointed out as an important step for sulfide saturation in general (e.g. Metrich et al., 2009, Jenner et al., 2010) in this study we show that magnetite crystallisation does not seem necessary for the saturation of any sulfide type, but is systematically associated with the iss-rich (chalcopyrite-pyrite) and iss-only (chalcopyrite-bornite/digenite), Cu-rich sulfide types (Type-3 and -4). Only rocks that have undergone magnetite crystallisation present Cu-richer sulfides, with the exception of Kula as well as the cases of Elmadag and Itecektepe ~~which lavas do not include magnetite~~ (Fig.7). These three volcanic centers are not associated with any known economic deposit.

In contrast, ~~Konya, Beydagi (Usak basin) and Ecuador are the only areas among those studied, which present iss-only (Type-4) and iss-richer (Type-3) sulfides. The rocks in which these sulfide types are present correspond to more evolved lithologies (SiO<sub>2</sub>>60 wt %), which are associated or potentially associated with economic deposits of the porphyry suite. It is noteworthy that this feature coincides with the fact that rocks from these areas are the only ones with iss-only (Type-4) and iss-richer (Type-3) sulfides. In particular, Type-4 sulfides (chalcopyrite-bornite+digenite) were observed in areas associated (Konya) or potentially associated (Ecuador) with porphyry Cu deposits (e.g. Konya-Doganbey and Ecuador-Cascabel/Lurimagua-Junin). Beydagi, where Type-3 sulfides (chalcopyrite-pyrite) are seen, is associated with a porphyry Au deposit (Kisladag). The above observation calls for further investigation since the presence of iss-rich and iss-only sulfide types, (like in cases 3 and 4); in felsic volcanic rocks and in particular in magnetite host minerals, could be used as a proxy for porphyry-Cu and porphyry-Au type deposits, respectively.~~

An additional significant implications based on the correlation between Type-3 and -4 sulfides high in Cu and ore deposits (Beydagi, Konya and Ecuador), combined with the similar initial metal contents of the magmas of these areas, suggests an increase in the Cu contents of the sulfides and in the later hydrothermal ore fluid which has not occurred in the other study areas. We argue that the later sulfide Type-3 and -4 (iss-rich/only, hosted in magnetite) can help us to further understand the transition between a sulfide-saturated system and a fluid-saturated system. In addition, taking into consideration how porphyry deposits in subduction settings are generally Cu-rich whereas those found in post-subduction settings tend to be Au-rich (e.g. Sillitoe, 1993, Li et al, 2006, Richards, 2009), future sulfide trace element LA-ICP-MS analysis including precise Au, Ag and PGE values (which constitute better markers for sulfide saturation identification, see Park et al., 2019, Park et al., 2015, Cocker et al., 2015, Jenner, 2017, Mandon, 2017) ~~will-could~~ help distinguish the conditions of magma fertility for the different geodynamic settings. Finally magmatic sulfide saturation will retain a certain amount of CSEs and deplete the

**Commented [AAG19]:**

After recommendation of Referee#1-Dan Smith

Please see 'Authors response to Referee#1 for entire comment and reply.

Ch: We have removed the part of the sentence referencing Kula.

**Commented [AAG20]:**

After the comment of Referee#1-Dan Smith:

C: How much of this is because the samples from other areas (e.g. Kula) are in lithologies typically excluded from porphyry exploration programmes - mostly for being too primitive? Are we really seeing implications for ore formation, or are both the sulphide assemblage and presence of mineralization a consequence of the melt evolution stage?

R: Thank you for the suggestion.

Ch: We have included the felsic nature of the lithologies as a possible factor for ore forming process. See also lines 412-413.

After the comment of Referee#2-Jonathan Naden:

C: The use of "remarkable" is hyperbole in this context, please rewrite this sentence in more circumspect terms.

Ch: We have rephrased as seen.

residual melt in them. Quantifying this metal loss is crucial in order to understand whether, for the **bigger** **picturesake** of ore forming processes, this loss is significant or not **and may be compensated by other more critical ingredients like an increase of volatiles and magma volumes** (Chiaradia and Caricchi, 2017). Modelling combined with experimental results on metal partition coefficients, petrographic observations and data compilation of real case sulfide mineral analysis can aid to solve this question.

## 7. Conclusions

~~There are four main conclusions~~In this study we have investigated the magmatic sulfide occurrence and chemistry during the evolution of different magma types (from high-K calc-alkaline to shoshonitic series) ins<sup>l</sup> study areas characterised by diverse geodynamic settings (post-subduction, syn-subduction and OIB-intraplate volcanism). Our data allow us to draw the following conclusions: (1) Sulfide saturation occurred in **magmatic rocks from** all study areas, independently of the magma composition, geodynamic regimes and whether or not the system produced an economic deposit. Sulfides were present in all rocks, corresponding to a wide range of composition (SiO<sub>2</sub> range = 46-68 wt.%, basalts to andesites/dacites and from high K-calc-alkaline to shoshonitic series), characterised by different geodynamic regimes (subduction, post-collision and intraplate OIB volcanism) some of which are associated with economic deposits (porphyry Cu and/or Au and Au epithermal); (2) According to their occurrence and chemical composition, sulfides can be classified in different types ~~and which~~ do not ~~necessarily~~ appear in all study areas. Type-1 sulfides are rare, mostly composed of Cu-poor phases (pyrrhotite, pentlandite-mss), hosted only by olivine phenocrysts and are seen only in Kula. Type-2 sulfides consist of a Cu-poor phase (pyrrhotite,  $\pm$ pentlandite), and a Cu-rich phase (cubanite, chalcopyrite). They are the most abundant type, hosted by different minerals (pyroxene, amphibole, magnetite, and plagioclase) and are found in all study areas. Type-3 sulfides are rare, composed of mostly a Cu-rich phase (chalcopyrite $\pm$ chalcocite) and pyrite, hosted by magnetite and are observed only in Beydagi. Type-4 sulfides are less abundant than Type-2 but more abundant than Type-1 and -3. They are composed of only Cu-rich phases (chalcopyrite-bornite $\pm$ digenite), hosted only by magnetite and observed solely in Konya and Ecuador. Type-5 sulfides are found in the groundmass as sulfide-oxide-silicate aggregates: they are mostly found in Kula and the sulfides are mainly Cu-poor. Type-3 and 4 are the sulfides with the highest Cu contents and are only observed in areas associated with porphyry Au and Cu deposits, respectively, together with epithermal Au deposits. (3) As the sulfide melt evolves, a decrease in Ni/Cu is observed, which is used here as a proxy for the mss/iss ratio. This chemical evolution corresponds to a sulfide melt evolution starting with an mss-rich sulfide melt, switching to an mss and iss-melt and finally (and uniquely for some settings) to iss-only sulfides. This suggests at least two sulfide saturating stages: an early mss-only or mss-rich and a late iss-only or iss-rich stage. Further research needs to address the question whether these stages are distinct or are part of a continuous process of sulfide saturation. (4) The initial metal content of the magma was very similar for all the study areas. This can be inferred from the similar proportions of the mss and iss of the early saturating stage sulfide (Type-2) for all investigated study areas (mss=84.2 and iss=15.7 area%, with 2 $\sigma$ = $\pm$ 2.2). Based on points 2 and 4<sup>3</sup> above, the correlation between sulfides high in Cu and ore deposits (**Beydagi, Konya and Ecuador**), combined with the similar mss and iss proportions ~~for in rocks from~~ all study areas, suggests ~~an increase in the~~that Cu contents of the sulfides and, potentially, of ~~a later Cu enrichment~~ the later hydrothermal ore-forming fluids (e.g., Nadeau et al., 2010); increase concurrently with a Cu ~~deprivation~~depletion of the residual magma. ~~for the cases of Beydagi, Konya and Ecuador.~~ (4<sup>3</sup>)This possibly suggests that metal enrichment in

**Commented [AAG21]:** After the comment of Referee#1-Dan Smith:

C: Does it really suggest Cu enrichment? Is this not just Ni depletion? Fig 3 doesn't support Konya being Cu-enriched (one sample above 30 ppm whole rock).

R: We agree with the comment, indeed the sentence needed re-phrasing, since the implication does not mean Cu-enrichment in the whole rock, rather in the sulphides.

Ch: We have re-phrased as seen.



derivative magmas is not an essential requirement for the fertility of the latter and that other factors associated with magma evolution (H<sub>2</sub>O content, magma volume: Rohrlach and Loucks, 2005; Chiaradia and Caricchi, 2017) could play a more important role. As the sulfide melt evolves, a decrease in Ni/Cu is observed, which is used here as a proxy for the mss/iss ratio. This chemical evolution corresponds to a sulfide melt evolution starting with an mss-rich sulfide melt, switching to an mss and iss melt and finally (and uniquely for some settings) to iss-only sulfides. This suggests at least two sulfide saturating stages: an early mss only or mss rich and a late iss only or iss rich stage. Further research needs to address the question whether these stages are distinct or are part of a continuous process of sulfide saturation.

## 8. Author Contribution

AG and MC designed the project and methodology. AG carried out petrographical investigation, EPMA sulfide analysis and bulk rock chemical analysis. AG wrote the manuscript with contributions from MC.

## 9. Acknowledgements

This study is funded by the Swiss National Science Foundation (grant N. 200021\_169032). We would like to acknowledge Luca Paolillo, Florian Franziskakis, Bastien Deriaz and Pablo Lormand for collecting samples from the Usak-Gure basin and from the Konya volcanic belt, during fieldwork in May 2016 as well as conducting part of the whole rock analysis, in the framework of their Master Thesis, supervised by Dr. Chiaradia Massimo at the University of Geneva. We are grateful to the Editor- Johan Lissenberg, as well as the two Referees Dan Smith and Jonathan Naden for their valuable and thorough revision of this study, which improved the original manuscript.

## 10. References

- Agangi, A., Reddy, S.M.: Open-system behaviour of magmatic fluid phase and transport of copper in arc magmas at Krakatau and Batur volcanoes, Indonesia. *J. Volcanol. Geoth. Res.*, 327, 669–686, doi: 10.1016/j.jvolgeores.2016.10.006, 2016.
- Agostini, S., Doglioni, C., Innocenti, F., Manetti, P., Tonarini, S., Savaşçin, M.Y.: The transition from subduction-related to intraplate Neogene magmatism in the Western Anatolia and Aegean area. *Geol. S. Am. S.*, 418, 1–15, doi: 10.1130/2007.2418(01), 2007.
- Aldanmaz, E.: Mantle source characteristics of alkali basalts and basanites in an extensional intracontinental plate setting, western Anatolia, Turkey: implications for multi-stage melting. *Int. Geol. Rev.*, 44, 440–457, doi: 10.2747/0020-6814.44.5.440, 2002.
- Alici, P., Temel, A., Gourgaud, A.: Pb–Nd–Sr isotope and trace element geochemistry of Quaternary extension-related alkaline volcanism: a case study of Kula region (Western Anatolia, Turkey). *J. Volcanol. Geoth. Res.*, 115, 487–510, doi: 10.1016/S0377-0273(01)00328-6, 2002.
- Audétat, A., Simon A.C.: Magmatic controls on porphyry copper genesis. In: Hedenquist J. W. Harris M. Camus F. (eds) *Geology and Genesis of Major Copper Deposits and Districts of the World: A Tribute to Richard H. Sillitoe*. Soc. Eco. Geo. Spc. Pub., 16, 553 – 572, 2012.
- Audétat, A., Pettke, T.: Evolution of a Porphyry-Cu Mineralized Magma System at Santa Rita, New Mexico (USA). *J. Petrol.*, 47, 2021–2046, doi: 10.5382/SP.16.21, 2006.
- Baker, T., Bickford, D., Juras, S., Oztas, Y., Ross, K., Tukac, A., Rabayrol, F., Miskovic, A., Friedman, R., Creaser, A.R., Spikings, R.: The Geology of the Kisladag porphyry gold deposit, Turkey. *Soc. Eco. Geo. Spc. Pub.*, 19, 57–83, doi: 10.5382/SP.19.03, 2016.
- Barnes, S.J., Holwell, D.A., Le Vaillant, M.: Magmatic sulfide ore deposits. *Elements*, 13, 91–97, doi: 10.2113/gselements.13.2.89, 2017.

- Blundy J., Mavrogenes, J.A., Tattitch, B., Sparks, S., Gilmer, A.: Generation of porphyry copper deposits by gas-brine reaction in volcanic arcs. *Nat. Geosci.* 8, doi: 10.1038/ngeo2351, 2015
- Brennecke, G.: Origin and metal content of magmatic sulfides in Cu-Au mineralizing silicic magmas: Yerington, Nevada and Yanacocha, Peru. M.S. thesis, Oregon State University, [https://ir.library.oregonstate.edu/concern/graduate\\_thesis\\_or\\_dissertations/rn301373p](https://ir.library.oregonstate.edu/concern/graduate_thesis_or_dissertations/rn301373p), 2006.
- Cabri, L.J.: New data on phase relations in the Cu-Fe-S system. *Econ. Geol.*, 68, 443-454, doi: 10.2113/gsecongeo.68.4.443, 1973.
- Çemen, I., Catlos, E.J., Gogus, O.H., Ozerdem, C.: Postcollisional extensional tectonics and exhumation of the Menderes massif in the Western Anatolia extended terrane, Turkey. *Geol. S. Am. S.*, 409, 353-379, doi: 10.1130/2006.2409(18), 2006.
- Chang, J., Audétat, A.: Petrogenesis and Metal Content of Hornblende- Rich Xenoliths from Two Laramide-age Magma Systems in Southwestern USA: Insights into the Metal Budget of Arc Magmas. *J. Petrol.*, 59, 1869-1898, doi: 10.1093/petrology/egy083, 2018.
- [Chelle-Michou, C., Rottier, B., Caricchi, L., Simpson, G.: Tempo of magma degassing and the genesis of porphyry copper deposits. \*Sci Rep\* 7., doi: 10.1038/srep40566, 2017.](#)
- Chiaradia, M.: Copper enrichment in arc magmas controlled by overriding plate thickness. *Nat. Geosci.*, 7, 43-46, doi: 10.1038/ngeo2028, 2014.
- Chiaradia, M., Caricchi, L.: Stochastic modelling of deep magmatic controls on porphyry copper deposit endowment. *Sci. Rep-UK.*, 7, 44523, doi: 10.1038/srep44523, 2017.
- [Cline, J.S., Bodnar, R.J.: Can economic porphyry copper mineralization be generated by a typical calc-alkaline melt? \*J. Geophys. Res.\*, 96, 8113-8126, doi: 10.1029/91JB00053, 1991.](#)
- Cocker, H.A., Valente, D.L., Park, J.-W., Campbell, I.H.: Using platinum group elements to identify sulfide saturation in a porphyry Cu system: the El Abra porphyry Cu deposit, Northern Chile. *J. Petrol.*, 56, 2491-2514, 2015.
- Cooke, D.R., Hollings, P., Walsh, J.L.: Giant porphyry deposits: characteristics, distribution, and tectonic controls. *Econ. Geol.*, 100, 801-818, doi: 10.1093/petrology/egv076, 2005.
- [Core, P., Kesler, S.E., Essene, E.J.: Unusually Cu-rich magmas associated with giant porphyry copper deposits: Evidence from Bingham, Utah. \*Geol.\* 34, doi: 10.1130/G21813.1, 2006.](#)
- Craig, J.R., Kullerud, G.: Phase relations in the Cu-Fe-Ni-S system and their application to magmatic ore deposits, doi: 10.5382/Mono.04, 1969.
- Craig, J.R., Scott, S.D.: Sulfide phase equilibria. P.H. Ribbe (Ed.), *Sulfide Mineralogy – Short Course Notes*, 1, Mineralogical Society of America, Southern Printing Co., Blacksburg, Virginia, CS1-110, ISBN13 978-0-939950-01-0, 1974.
- Delibaş, O., Moritz, R., Chiaradia, M., Selby, D., Ulianov A., Revan, K.M.: Post-collisional magmatism and ore-forming systems in the Menderes massif: new constraints from the Miocene porphyry Mo-Cu Pınarbaşı system, Gediz-Kütahya, western Turkey. *Miner. Deposita*, 52, 1157-1178, doi: 10.1007/s00126-016-0711-7, 2017.
- Delibaş, O., Moritz, R., Ulianov, A., Chiaradia, M., Saraç, C., Revan, K.M., Göç, D.: Cretaceous subduction-related magmatism and associated porphyry-type Cu-Mo prospects in the Eastern Pontides, Turkey: new constraints from geochronology and geochemistry. *Lithos*, 248, 119-137, doi: 10.1016/j.lithos.2016.01.020, 2016.
- Dilek, Y., Imamverdiyev, N., Altunkaynak, S.: Geochemistry and tectonics of Cenozoic volcanism in the Lesser Caucasus (Azerbaijan) and the peri-Arabian region: collision-induced mantle dynamics and its magmatic fingerprint. *International Geology Review*, 52, 536-578, doi: 10.1080/00206810903360422, 2010.
- Dilek, Y., Altunkaynak, S.: Cenozoic crustal evolution and mantle dynamics of post-collisional magmatism in western Anatolia. *Int. Geol. Rev.*, 49, 431-453, doi: 10.2747/0020-6814.49.5.431, 2007.
- Dogliani, C., Agostini, S., Crespi, M., Innocenti, F., Manetti, P., Riguzzi, F., Savaschin, Y.: On the extension in western Anatolia and the Aegean Sea. *J. Virtual Explorer*, 8, 169-183, doi: 10.3809/jvirtex.2002.00049, 2002.
- Dogliani, C., Tonarini, S., Innocenti, F.: Mantle wedge asymmetries and geochemical signatures along W-and E-NE-directed subduction zones. *Lithos*, 113, 179-189, doi: 10.1016/j.lithos.2009.01.012, 2009.
- Du, Y., Qin, X., Barnes, C., Cao Y., Dong, Q., Du, Yangsong, D.: Sulfide melt evolution in upper mantle to upper crust magmas Tongling, China. *Geosci. Front.*, 5, 237-248, doi: 10.1016/j.gsf.2013.06.003, 2014.
- Ercan, T., Satir, M., Kreuzer, H., Türkecan, A., Günay, E., Cevikbas, A., Ates, M., Can, B.: Batı Anadolu Senozoyik volkanitlerine ait yeni kimyasal, izotopik ve radyometrik verilerin yorumu. *Türkiye Jeoloji Kurumu Bulteni*, 28, 121-136, 1985.
- Ercan, T., Dincel, A., Metin, S., Turkecan, A., Gunay, E.: Geology of the Neogene basins in the Usak region. *Bull. Min. Res. Exploration*. (in Turkish), 21, 97-106, 1978.
- Ercan, T., Oztunali, O.: Characteristic features and "base surges" bed forms of Kula volcanics. *Bull. Geol. Soc. Turkey*. (in Turkish with English abs), 25, 117-125, 1982.
- Ercan, T., Türkecan, A., Dinçel, A., Günay, A.: Geology of Kula-Selendi (Manisa) area. *Geol. Engineering*. (in

- Turkish), 17, 3–28, 1983.
- Ersoy, E.Y., Helvacı, C., Palmer, M.R.: Mantle source characteristics and melting models for the early-middle Miocene mafic volcanism in Western Anatolia: implications for enrichment processes of mantle lithosphere and origin of K-rich volcanism in post-collisional settings. *J. Volcanol. Geoth. Res.*, 198, 112–128, doi: 10.1016/j.jvolgeores.2010.08.014, 2010.
- Feininger, T., Seguin, M.K.: Simple Bouguer gravity anomaly field and the inferred crustal structure of continental Ecuador. *Geology*, 11, 40–44, doi: 10.1130/0091-7613(1983)11<40:SBGAFA>2.0.CO;2, 1983.
- Fontboté, L., Kouzmanov, K., Chiaradia, M., Pokrovski, G.S.: Sulfide minerals in hydrothermal deposits. *Elements*, 13, 97–103, doi: 10.2113/gselements.13.2.97, 2017.
- Fulignati P., Gioncada, A., Costa, S., Di Genova, D., Di Traglia F., Pistolesi, M.: Magmatic sulfide immiscibility at an active magmatic-hydrothermal system: The case of La Fossa (Vulcano, Italy). *J. Volcanol. Geoth. Res.*, 358 45–57, doi: 10.1016/j.jvolgeores.2018.06.009, 2018.
- Georgatou, A., Chiaradia, M., Rezeau, H., Walle, M.: Magmatic sulfides in Quaternary Ecuadorian arc magmas. *Lithos*, 296–299, 580–599, doi: 10.1016/j.lithos.2017.11.019, 2018.
- Greau, Y., Alard, O., Griffin, W.L., Huang, J.-X., O'Reilly, S.Y.: Sulfides and chalcophile elements in Roberts Victor eclogites: Unravelling a sulfide-rich metasomatic event. *Chem. Geol.*, 354, 73–92, doi: 10.1016/j.chemgeo.2013.06.015, 2013
- Grutznier, T., Prelević, D., Cüneyt, A.: Geochemistry and origin of ultramafic enclaves and their basanitic host rock from Kula Volcano, Turkey. *Lithos*, 180–181, 58–73, doi: 10.1016/j.lithos.2013.08.001, 2013.
- Guillier, B., Chatelain, J., Jaillard, E., Yepes, H., Poupinet, G., Fels, J.: Seismological evidence on the geometry of the orogenic system in central-northern Ecuador (South America). *Geophys. Res. Lett.*, 28, 3749–3752, doi: 10.1029/2001GL013257, 2001.
- Hall, D.J., Foster, R.P., Yildiz, B., Redwood, S.D.: The Inlice High-sulphidation Epithermal Gold Discovery: Defining a Potential New Gold Belt in Turkey. Digging Deeper, Proceedings of the Ninth Biennial Meeting of the Society for Geology Applied to Mineral Deposits (January) 113–116, 2007.
- Halter, W.E., Heinrich, C.A., Pettke, T.: Magma evolution and the formation of porphyry Cu–Au ore fluids: evidence from silicate and sulfide melt inclusions. *Miner. Deposita*, 39, 845–863, doi: 10.1007/s00126-004-0457-5, 2005.
- Hattori, K.: High-sulfur magma, a product of fluid discharge from underlying mafic magma: Evidence from Mount Pinatubo, Philippines. *Geology*, 21, 1083–1086, doi: 10.1130/0091-7613(1993)021<1083:HSMAP0>2.3.CO;2, 1993.
- Hattori, K.: Occurrence and origin of sulfide and sulfate in the 1991 Mount Pinatubo eruption products. In: Newhall, C.G., Punongbayan, R.S. (Eds.), *Fire and Mud: Eruptions and Lahars of Mount Pinatubo*, Philippines. University of Washington Press, 807–824, USGS, <https://pubs.usgs.gov/pinatubo/hattori/>, 1996.
- Holwell, D.A., McDonald, I.: A review of the behaviour of platinum group elements within natural magmatic sulfide ore systems. *Platin. Me. Rev.*, 54, 26–36, doi: 10.1595/147106709X480913, 2010.
- Holwell, D.A., Keays, R., McDonald, I., Williams, M.: Extreme enrichment of Se, Te, PGE and Au in Cu sulfide microdroplets: evidence from LA-ICP-MS analysis of sulfides in the Skaergaard Intrusion, east Greenland. *Contrib. Mineral. Petr.*, 170, 53, doi: 10.1007/s00410-015-1203-y, 2015.
- Hou, Z., Zhang, H., Pan, X., and Yang, Z.: Porphyry Cu (–Mo–Au) deposits related to melting of thickened mafic lower crust: examples from the eastern Tethyan metallogenic domain. *Ore Geol. Rev.*, 39, 21–45, doi: 10.1016/j.oregeorev.2010.09.002, 2011.
- Innocenti, F., Agostini, S., Di Vincenzo, G., Doglioni, C., Manetti, P., Savaşçın, M. Y., Tonarini, S.: Neogene and Quaternary volcanism in Western Anatolia: magma sources and geodynamic evolution. *Mar. Geol.*, 221, 397–421, doi: 10.1016/j.margeo.2005.03.016, 2005.
- Jenner, F.E.: Cumulate causes for the low contents of sulfide-loving elements in the continental crust. *Nat. Geosci.*, 10, 524–529, doi: 10.1038/ngeo2965, 2017.
- Jenner, F.E., O'Neill, H., ST.C., Arculus, R.J., Mavrogenes, J.A.: The magnetite crisis in the evolution of arc-related magmas and the initial concentrations of Au, Ag, and Cu. *J. Petrol.*, 2445–2464, doi: 10.1093/petrology/egq063, 2010.
- Jensen, E.: Pyrrhotite: melting relations and composition. *Am. J. Sci.*, 240, 695–709, doi: 10.2475/ajs.240.10.695, 1942.
- Karaoğlu, Ö., Helvacı, C., Ersoy, Y.: Petrogenesis and 40 Ar/39 Ar geochronology of the volcanic rocks of the Uşak-Güre basin, western Türkiye. *Lithos*, 119, 193–210, doi: 10.1016/j.lithos.2010.07.001, 2010.
- Keith, J.D., Whitney, J.A., Hattori, K., Ballantyne, G.H., Christiansen, E.H., Barr, D.L., Cannan, T.M. and Hook, C.J.: The role of magmatic sulfides and mafic alkaline magmas in the Bingham and Tintic mining districts, Utah. *J. Petrol.*, 3 1679–1690, doi: 10.1093/ptro/38.12.1679, 1997.
- Keith, M., Haase, K., Klemm, R., Schwarz-Schampera, U., Franke, H.: Systematic variations in magmatic sulfide chemistry from mid-ocean ridges, back-arc basins and island arcs. *Chem. Geol.*, 451, 67–77, doi: 10.1016/j.chemgeo.2016.12.028, 2017.

- 730 Keller, J., Burgath K., Jung D., Wolff, F.: Geologie und petrologie des neogenen kalkalkali-vulkanismus von Konya (Erenler Dag-Alaca Dag-Massiv, Zentral-Anatolien) *Geologisches Jahrbuch* 25, 37-117, 1977.
- Kelley, K.A., Cottrell, E.: Water and the oxidation state of subduction zone magmas. *Science*, 325, 605-607, doi: 10.1126/science.1174156, 2009.
- 735 Korkmaz, G., Kursad, A., Huseyin, K., Ganerod, M.: 40Ar/39Ar geochronology, elemental and Sr-Nd-Pb isotope geochemistry of the Neogene bimodal volcanism in the Yükselen area, NW Konya (Central Anatolia, Turkey). *J. African Earth Sci.*, 129, 427-444, 2017.
- Kullerud, G., Yund, R.A., Moh, G.H.: Phase relation in the Cu-Fe-Ni, Cu-Ni-S and Fe-Ni-S systems. *Econ. Geol.*, 4, 323-343, doi: 10.1016/j.jafrearsci.2017.02.001, 1969.
- 740 Larocque, A.C., Stimac, J.A., Keith, J.D., Huminicki, M.A.: Evidence for open-system behavior in immiscible Fe-S-O liquids in silicate magmas: implications for contributions of metals and sulfur to ore-forming fluids. *Can. Mineral.*, 38, 1233-1249, doi: 10.2113/gscanmin.38.5.1233, 2000.
- Li, J., Qin, K.Z., Li, G.: Basic characteristics of gold-rich porphyry copper deposits and their ore sources and evolving processes of high oxidation magma and ore-forming fluid. *Acta Petrol. Sin.*, 22, 678-688, 2006.
- 745 Loucks, R.B.: Distinctive composition of copper-ore-forming arc magmas. *Aust. J. Earth Sci.*, 61, 5-16, doi: 10.1080/08120099.2013.865676, 2014.
- Mandon, C.L.: Volatile transport of metals in the andesitic magmatic-hydrothermal system of White Island. M.S. thesis. Victoria University of Wellington, Hdl:10063/32. Web., 2017.
- Metrich, N., Berry, A.J., O'Neill, H.S., Susini, J.: The oxidation state of sulfur in synthetic and natural glasses determined by X-ray absorption spectroscopy. *Geochimica et Cosmochimica Acta* 73, 2382-2399, doi: 10.1016/j.gca.2009.01.025, 2009.
- 750 Mungall, J., Brenan, J.: Partitioning of platinum-group elements and Au between sulfide liquid and basalt and the origins of mantle-crust fractionation of the chalcophile elements. *Geochim. Cosmochim. Ac.*, 125, 265-289, doi: 10.1016/j.gca.2013.10.002, 2014.
- Nadeau, O., Williams-Jones, A.E., Stix, J.: Sulfide magma as a source of metals in arc-related magmatic hydrothermal ore fluids. *Nat. Geosci.*, 3, 501-505, doi: 10.1038/ngeo899, 2010.
- 755 Naldrett, A.: *Magmatic Sulfide Deposits Geology, Geochemistry and Exploration*. Springer Science and Business Media. Chapter 2: Theoretical considerations. doi: 10.1007/978-3-662-08444-1, 2013
- Naldrett, A., Gasparrini E.: Archean nickel sulfide deposits in Canada: their classification geological setting and genesis with some suggestions as to exploration. *Geol. Soc. Aust. S.*, 3, 201-226, doi: 10.1007/978-3-662-08444-1. 1971.
- 760 Parat, F., Holtz, F., Streck, M.J.: Sulfur-bearing Magmatic Accessory Minerals. *Rev. Mineral. Geochem.*, 73, 285-314, doi: 10.2138/rmg.2011.73.10, 2011.
- Park, J.W., Campbell, I., Kim, J., Moon, J.-W.: The role of sulfide saturation on formation of a Cu- and Au-rich magma: insights from the platinum group element geochemistry of Niutahi-Motutahi lavas, Tonga rear arc. *J. Petrol.*, 56, 59-81, doi: 10.1093/petrology/egu071, 2015.
- 765 Park, J-W., Campbell, I.H., Malaviarachchi, S.P.K., Cocker, H., Hao, H., Kay, S.M.: Chalcophile element fertility and the formation of porphyry Cu ± Au deposits. *Mineral. Deposita*, 54, 657-670, doi: 10.1007/s00126-018-0834-0, 2019.
- Patten, C., Barnes, S.J., Mathez, E.A.: Textural variations in MORB sulfide droplets due to differences in crystallization history. *Can. Mineral.*, 50, 675-692, doi: 10.3749/canmin.50.3.675, 2012.
- 770 Pe-Piper, G., Piper, D.J.: Late Cenozoic, post-collisional Aegean igneous rocks: Nd, Pb and Sr isotopic constraints on petrogenetic and tectonic models. *Geol. Magazine*, 138, 653-668, doi: 10.1017/S0016756801005957, 2001.
- Prelević, D., Akal, C., Foley, S.F., Romer, R.L., Stracke, A., Van Den Bogaard, P.: Ultrapotassic mafic rocks as geochemical proxies for post-collisional dynamics of orogenic lithospheric mantle: the case of southwestern Anatolia, Turkey. *J. Petrol.*, 53, 1019-1055, doi: 10.1093/petrology/egs008, 2012.
- 775 Rabayrol, F., Hart C.J.R., Thorkelson, D.J.: Temporal, spatial and geochemical evolution of late Cenozoic post-subduction magmatism in central and eastern Anatolia, Turkey, *Lithos*, 336-337, 67-96, doi: 10.1016/j.lithos.2019.03.022, 2019.
- Redwood, S.D.: Exploration of the Doğanbey Project, Konya, Turkey. Report for Stratex International plc, London, April, 26, 2006.
- 780 Richards, J.P., Kerrich, R.: Special Paper: Adakite-Like Rocks: Their Diverse Origins and Questionable Role in Metallogenesis. *Econ. Geol.*, 102, 537-576, doi: 10.2113/gsecongeo.102.4.537, 2007.
- Richards, J.P.: Postsubduction porphyry Cu-Au and epithermal Au deposits: Products of remelting of subduction-modified lithosphere. *Geology*, 37, 247-250, doi: 10.1130/G25451A.1, 2009.
- 785 Richards, J.P.: High Sr/Y arc magmas and porphyry Cu Mo Au deposits: Just add water. *Econ. Geol.*, 106, 1075-1081, doi: 10.2113/econgeo.106.7.1075, 2011.
- Richards, J.P.: Giant ore deposits form by optimal alignments and combinations of geological processes: *Nat. Geosci.*, 6, 911-916, doi: 10.1038/ngeo1920, 2013.
- Richardson-Bunbury, J.M.: The Kula volcanic field, western Turkey; the development of a Holocene alkali basalt

790 province and the adjacent normal-faulting graben. *Geol. Magazine*, 133, 275–283, doi: 10.1017/S0016756800009018, 1996.

[Rohrlach, B.D., Loucks, R.P.: Multi-million-year cyclic ramp-up of volatiles in a lower crustal magma reservoir trapped below the Tampakan copper-gold deposit by Mio-Pliocene crustal compression in the southern Philippines. In book 'Super Porphyry Copper & Gold Deposits—A Global Perspective', 2005.](#)

795 Savelyev, D.P., Kamenetsky, V.S., Danyushevsky, L.V., Botcharnikov, R.E., Kamenetsky, M.B., Park, J.-W., Portnyagin, M.V., Olin, P., Krasheninnikov, S.P., Haufl, F.: Immiscible sulfide melts in primitive oceanic magmas: Evidence and implications from picrite lavas (Eastern Kamchatka, Russia). *Am. Mineral.*, 103, 886–898, doi: 10.2138/am-2018-6352, 2018.

800 Schütte, P., Chiaradia, M., Barra, F., Villagómez, D., Beate, B.: Metallogenic features of Miocene porphyry Cu and porphyry-related mineral deposits in Ecuador revealed by Re–Os, 40Ar/39Ar, and U–Pb geochronology. *Mineral. Deposita*, 47, 383–410, doi: 10.1007/s00126-011-0378-z, 2012.

Seyitoglu, G.: Late Cenozoic tectono-sedimentary development of the Selendi and Usak-Güre basins: a contribution to the discussion on the development of east–west and north trending basins in western Turkey. *Geol. Magazine*, 134, 163–175, doi: 10.1017/S0016756897006705, 1997.

805 Shafiei, B., Haschke, M., Shahabpour, J.: Recycling of orogenic arc crust triggers porphyry Cu mineralisation in Kerman Cenozoic arc rocks, south-eastern Iran. *Mineral. Deposita*, 44, 265–283, doi: 10.1007/s00126-008-0216-0, 2009.

[Shaw, C.J.: Origin of sulfide blebs in variably metasomatized mantle xenoliths, Quaternary West Eifel volcanic field, Germany. \*Canad. Mineral.\* 35, 1453–1463, ISSN 1499-1276, 1997.](#)

810 Sillitoe, R.H.: A Plate Tectonic Model for the Origin of Porphyry Copper Deposits. *Econ. Geol.*, 67, 184–197, doi: 10.2113/gsecongeo.67.2.184, 1972.

Sillitoe, R.H.: Gold-rich porphyry copper deposits: Geological model and exploration implications. *Geol. Associ. Can. S.*, 40, 465–478, <https://eurekamag.com/research/019/092/019092917.php>, 1993.

Sillitoe, R.H.: Some metallogenic features of gold and copper deposits related to alkaline rocks and consequences for exploration. *Mineral. Deposita*, 37, 4–13, doi: 10.1007/s00126-001-0227-6, 2002.

815 Sillitoe, R.H.: Copper provinces, in Hedenquist, J.W., et al., eds., *Geology and Genesis of Major Copper Deposits and Districts of the World: A Tribute to Richard H. Sillitoe*. *Soc. Eco. Geo. Spc. Pub.*, 16, 1–18, doi: 10.5382/SP.17, 2012.

Temel, A.: Post-collisional Miocene alkaline volcanism in the oğlakçı region, Turkey: *Petrol. Geochem. Int. Geol. Rev.*, 43, 640–660, doi: 10.1080/00206810109465038, 2001.

820 Temel, A., Gundogdu, M.N., Gourgaud, A.: Petrological and geochemical characteristics of Cenozoic high-K calc-alkaline volcanism in Konya, Central Anatolia, Turkey. *J. Volcanol. Geoth. Res.*, 85, 327–354, doi: 10.1016/S0377-0273(98)00062-6, 1998.

825 Tokçar, M., Agostini, S., Savaşın, M.Y.: Geotectonic setting and origin of the youngest Kula volcanics (western Anatolia), with a new emplacement model. *Turk. J., Earth Sci.*, 14, 145–166, 2005.

Tsujimura T., Kitakaze, A.: New phase relations in the Cu–Fe–S system at 800°C; constraint of fractional crystallization of a sulfide liquid. *Neues Jahrbuch für Mineralogie - Monatshefte*, 10, 433–444, doi: 10.1127/0028-3649/2004/2004-0433, 2004.

830 Westaway, R., Pringle, M., Yurtmen, S., Demir, T., Bridgland, D., Rowbotham, G., Maddy, D.: Pliocene and Quaternary regional uplift in western Turkey: the Gediz River terrace staircase and the volcanism at Kula. *Tectonophysics*, 391, 121–169, doi: 10.1016/j.tecto.2004.07.013, 2004.

Wilke, M., Klimm, K., Kohn, S.C.: Spectroscopic Studies on Sulfur Speciation in Synthetic and Natural Glasses. *Rev. Mineral. Geochem.*, 73, 41–78, doi: 10.2138/rmg.2011.73.3, 2011.

835 Wilkinson, J.J.: Triggers for the formation of porphyry ore deposits in magmatic arcs. *Nat. Geosci.*, 6, 917–925, doi: 10.1038/ngeo1940, 2013.

[Yang, Z.M., Lu, Y.J., Hou, Z.Q., Chang, Z.S.: High-Mg diorite from Qulong in southern Tibet: Implications for the genesis of adakite-like intrusions and associated porphyry Cu deposits in collisional orogens. \*J. Petrol.\*, 56, 227–254, doi: 10.1093/petrology/egv076, 2015.](#)

840 Yund, R., Kullerud, G.: Thermal stability of assemblages in Cu–Fe–S system. *J. Petrol.*, 7, 456–488, doi: 10.1093/petrology/7.3.454, 1966.

Zelenski, M., Kamenetsky, V.S., Mavrogenes, J.A., Gurekno, A.A., Danyushevsky, L.V.: Silicate–sulfide liquid immiscibility in modern arc basalt (Tolbachik volcano, Kamchatka): part I. Occurrence and compositions of sulfide melts. *Chem. Geol.*, 471, 92–110, doi: 10.1016/j.chemgeo.2017.09.019, 2017.

845 Zhang, D., Audétat A.: Chemistry, mineralogy and crystallization conditions of porphyry Mo-forming magmas at Urad-Henderson and silver creek, Colorado, USA. *J. Petrol.*, 58, 277–296, doi: 10.1093/petrology/egx016, 2017.

Zürcher, L., Bookstrom, A.A., Hammarstrom, J.M., Mars, J.C., Ludington, S., Zientek, M.L., Dunlap, P., Wallis, J.C., with contributions from Drew, L.J., Sutphin, D.M., Berger, B.R., Herrington, R.J., Billa, M., Kuşcu, I., Moon, C.J., Richards, J.P.: Porphyry copper assessment of the Tethys region of western and southern Asia:

850 U.S. Geol. Surv. Sci. Invest. Rep., 2010-5090, 232, and spatial data, doi:10.3133/sir20105090V, 2015.

### Tables and Table Captions

Table 1. EPMA summary for individual sulfide analysis (N=number of measurements) corresponding to each sulfide type for every study area. The empty cells (-) correspond to a lack of measurement either because it was below determination limit or not measured. For complete dataset, analytical conditions and detection limits see Table 4 in doi:10.6084/m9.Figshare.8230787.

| Area       | Type (N) | Whole Rock Chemistry |        |                      |      | EPMA Sulfide Chemistry (wt %) |      |      |      |      |      |      |      |     |
|------------|----------|----------------------|--------|----------------------|------|-------------------------------|------|------|------|------|------|------|------|-----|
|            |          |                      | Cu ppm | SiO <sub>2</sub> wt% | S    | Cu                            | Fe   | Ni   | As   | Se   | Zn   | Ag   | Au   | Tot |
| Beydağı    | 2 (17)   | med                  | 7      | 62                   | 38   | 0.3                           | 55   | 0.15 | 0.03 | 0.2  | 0.5  | 0.02 | 0.22 | 98  |
|            |          | min                  | 4.2    | 46                   | 35   | 0.01                          | 29   | 0.03 | 0.03 | 0.02 | 0.5  | 0.01 | 0.15 | -   |
|            |          | max                  | 29     | 72                   | 53   | 34                            | 58   | 0.77 | 0.03 | 0.02 | 0.5  | 0.02 | 0.27 | -   |
|            |          | av                   | 12     | 62                   | 40   | 6.6                           | 49   | 0.31 | 0.03 | 0.02 | 0.5  | 0.02 | 0.22 | 99  |
|            |          | SD                   | 6.7    | 3.9                  | 5.7  | 11                            | 10   | 0.28 | -    | -    | -    | -    | 0.05 | -   |
|            | 3 (16)   | med                  | 18     | 59                   | 35   | 32                            | 31   | 0.12 | 0.07 | 0.03 | 0.98 | 0.01 | 0.24 | 99  |
|            |          | min                  | 6.7    | 59                   | 33   | 0.17                          | 31   | 0.01 | 0.07 | 0.03 | 0.73 | 0.01 | 0.24 | -   |
|            |          | max                  | 18     | 63                   | 53   | 33                            | 58   | 1.21 | 0.07 | 0.03 | 3    | 0.02 | 0.24 | -   |
|            |          | av                   | 17     | 59                   | 38   | 24                            | 35   | 0.32 | 0.07 | 0.03 | 1.4  | 0.01 | 0.24 | 99  |
|            |          | SD                   | 2.8    | 1                    | 6.1  | 13                            | 7.6  | 0.43 | -    | -    | 0.9  | -    | -    | -   |
|            | 5 (6)    | med                  | 6.7    | 63                   | 38   | 0.78                          | 56   | 0.04 | -    | -    | 0.71 | 0.02 | 0.14 | 97  |
|            |          | min                  | 6.7    | 59                   | 33   | 0.08                          | 29   | 0.01 | -    | -    | 0.59 | 0.02 | 0.14 | -   |
|            |          | max                  | 18     | 63                   | 51   | 32                            | 58   | 0.21 | -    | -    | 2.4  | 0.02 | 0.14 | -   |
|            |          | av                   | 10     | 61                   | 38   | 11                            | 47   | 0.07 | -    | -    | 1.2  | 0.02 | 0.14 | 97  |
|            |          | SD                   | 5.6    | 2.1                  | 5.3  | 15                            | 13   | 0.07 | -    | -    | 1.03 | -    | -    | -   |
| İtecektepe | 2 (26)   | med                  | 7      | 62                   | 38   | 0.03                          | 57   | 0.1  | -    | 0.04 | 0.81 | 0.02 | 0.18 | 97  |
|            |          | min                  | 5.1    | 61                   | 35   | 0.01                          | 52   | 0.02 | -    | 0.04 | 0.57 | 0.01 | 0.18 | -   |
|            |          | max                  | 13     | 64                   | 39   | 6.1                           | 58   | 0.25 | -    | 0.04 | 1.5  | 0.03 | 0.18 | -   |
|            |          | av                   | 7.2    | 62                   | 38   | 0.27                          | 57   | 0.1  | -    | 0.04 | 0.88 | 0.02 | 0.18 | 97  |
|            |          | SD                   | 1.6    | 0.85                 | 0.85 | 1.2                           | 1.3  | 0.05 | -    | -    | 0.34 | 0.01 | -    | -   |
|            | Elmadag  | med                  | 26     | 61                   | 37   | 0.14                          | 56   | 0.26 | 0.04 | -    | 0.75 | 0.02 | -    | 96  |
|            |          | min                  | 4.3    | 56                   | 35   | 0.01                          | 32   | 0.04 | 0.04 | -    | 0.72 | 0.02 | -    | -   |
|            |          | max                  | 63     | 69                   | 39   | 29                            | 58   | 1.5  | 0.04 | -    | 0.79 | 0.02 | -    | -   |
|            |          | av                   | 26     | 61                   | 37   | 4.2                           | 53   | 0.4  | 0.04 | -    | 0.75 | 0.02 | -    | 96  |
|            |          | SD                   | 12     | 2.9                  | 1.29 | 11                            | 8.73 | 0.47 | -    | -    | 0.05 | -    | -    | -   |
| Kula       | 1 (10)   | med                  | 29     | 47                   | 38   | 0.05                          | 56   | 4.2  | 0.04 | 0.02 | -    | -    | 0.04 | 98  |
|            |          | min                  | 29     | 47                   | 36   | 0.03                          | 45   | 3    | 0.03 | 0.02 | -    | -    | 0.04 | -   |
|            |          | max                  | 30     | 48                   | 39   | 0.34                          | 57   | 14   | 0.06 | 0.03 | -    | -    | 0.04 | -   |
|            |          | av                   | 29     | 48                   | 38   | 0.15                          | 54   | 6    | 0.04 | 0.02 | -    | -    | 0.04 | 98  |
|            |          | SD                   | 0.25   | 0.35                 | 0.76 | 0.14                          | 4.4  | 4.3  | 0.01 | -    | -    | -    | -    | -   |
|            | 2 (190)  | med                  | 29     | 47                   | 38   | 0.1                           | 58   | 0.77 | 0.04 | 0.04 | 0.03 | 0.02 | 0.05 | 98  |
|            |          | min                  | 23     | 37                   | 38   | 0.01                          | 5.8  | 0.01 | 0.02 | 0.02 | 0.02 | 0.01 | 0.03 | -   |
|            |          | max                  | 61     | 66                   | 40   | 32                            | 62   | 41   | 0.1  | 0.08 | 0.16 | 0.04 | 0.22 | -   |
|            |          | av                   | 30     | 47                   | 36   | 2.4                           | 54   | 2.9  | 0.05 | 0.04 | 0.05 | 0.02 | 0.06 | 98  |
|            |          | SD                   | 4.2    | 1.7                  | 5.9  | 6.3                           | 10   | 7.3  | 0.02 | 0.01 | 0.04 | 0.01 | 0.04 | -   |
|            | 5 (35)   | med                  | 29     | 47                   | 37   | 0.45                          | 59   | 0.78 | 0.05 | 0.03 | 0.03 | 0.02 | 0.04 | 98  |
|            |          | min                  | 28     | 47                   | 33   | 0.01                          | 35   | 0.04 | 0.02 | 0.02 | 0.02 | 0.01 | 0.03 | -   |
|            |          | max                  | 35     | 48                   | 40   | 26                            | 61   | 22   | 0.08 | 0.06 | 0.16 | 0.05 | 0.11 | -   |



|         |         |     |     |      |     |      |     |      |      |      |      |      |      |     |
|---------|---------|-----|-----|------|-----|------|-----|------|------|------|------|------|------|-----|
| Konya   | 2 (187) | av  | 30  | 47   | 37  | 4.7  | 55  | 1.8  | 0.05 | 0.04 | 0.05 | 0.02 | 0.05 | 98  |
|         |         | SD  | 2.6 | 0.31 | 1.8 | 8.5  | 8.3 | 4.1  | 0.01 | 0.01 | 0.04 | 0.01 | 0.02 | -   |
|         |         | med | 12  | 61   | 38  | 0.09 | 58  | 0.11 | 0.04 | 0.02 | 0.04 | 0.05 | -    | 97  |
|         |         | min | 4.6 | 46   | 26  | 0.01 | 15  | 0.01 | 0.02 | 0.01 | 0.01 | 0.01 | -    | -   |
|         |         | max | 50  | 70   | 48  | 69   | 60  | 9.4  | 0.08 | 0.05 | 0.23 | 0.11 | -    | -   |
|         |         | av  | 13  | 62   | 37  | 4.2  | 55  | 0.23 | 0.04 | 0.02 | 0.04 | 0.05 | -    | 96  |
|         | 4 (19)  | SD  | 4.8 | 2.9  | 3.2 | 11   | 8.7 | 0.79 | 0.02 | 0.01 | 0.04 | 0.03 | -    | -   |
|         |         | med | 13  | 62   | 26  | 56   | 16  | 0.01 | 0.05 | 0.02 | 0.06 | 0.06 | -    | 99  |
|         |         | min | 12  | 61   | 22  | 38   | 5.6 | 0.01 | 0.02 | 0.02 | 0.06 | 0.04 | -    | -   |
|         |         | max | 21  | 62   | 33  | 72   | 29  | 0.11 | 0.06 | 0.02 | 0.06 | 0.07 | -    | -   |
|         |         | av  | 14  | 62   | 27  | 54   | 18  | 0.02 | 0.04 | 0.02 | 0.06 | 0.06 | -    | 99  |
|         |         | SD  | 3.5 | 0.33 | 3.1 | 11   | 7.1 | 0.02 | 0.02 | -    | -    | 0.01 | -    | -   |
| Ecuador | 2 (172) | med | 23  | 62   | 39  | 1.27 | 58  | 0.4  | 0.04 | -    | 0.02 | -    | -    | 98  |
|         |         | min | 6   | 48   | 20  | 0.01 | 17  | 0.01 | 0.01 | -    | 0.02 | -    | -    | -   |
|         |         | max | 105 | 77   | 53  | 36   | 65  | 10   | 45   | -    | 0.02 | -    | -    | -   |
|         |         | av  | 27  | 62   | 38  | 11   | 52  | 0.68 | 1.18 | -    | 0.02 | -    | -    | 98  |
|         |         | SD  | 15  | 3.3  | 3.2 | 14   | 11  | 1.14 | 7.01 | -    | -    | -    | -    | -   |
|         |         | med | 32  | 60   | 27  | 56   | 17  | 0.39 | 0.08 | -    | -    | 0.02 | -    | 100 |
|         | 4 (22)  | min | 16  | 58   | 25  | 40   | 14  | 0.23 | 0.01 | -    | -    | 0.01 | -    | -   |
|         |         | max | 38  | 64   | 32  | 66   | 27  | 0.56 | 0.32 | -    | -    | 0.02 | -    | -   |
|         |         | av  | 31  | 60   | 27  | 55   | 18  | 0.39 | 0.08 | -    | -    | 0.02 | -    | 100 |
|         |         | SD  | 4.8 | 1.8  | 1.9 | 7.4  | 4.1 | 0.23 | 0.08 | -    | -    | -    | -    | -   |

860 Table 2. Summary composition of 100 reconstructed sulfides belonging to different sulfide types (N=number of sulfides reconstructed) observed in every study area except Itecektepe and Elmadag where the Cu-rich phase was too small to analyse with the EPMA. The empty cells (-) correspond to a lack of measurement either because it was below determination limit or not measured. For complete dataset (including mss/iss area% of Itecektepe and Elmadag) see Table 5 in doi:10.6084/m9.Figshare.8230787.

|         |          | Whole Rock med |                  | Area med% |      |      |       | EPMA med wt% Reconstruction |       |      |      |      |      |      |      |     |  |  |
|---------|----------|----------------|------------------|-----------|------|------|-------|-----------------------------|-------|------|------|------|------|------|------|-----|--|--|
| Area    | Type (N) | Cu ppm         | SiO <sub>2</sub> | mss       | iss  | void | S     | Cu                          | Fe    | Ni   | As   | Se   | Zn   | Ag   | Au   | Tot |  |  |
| Beydağı | 2(1)     | 17.85          | 58.67            | 95.5      | 4.5  | 16.7 | 38.77 | 0.69                        | 56.67 | 0.73 | -    | -    | -    | -    | 0.08 | 97  |  |  |
|         | 3(8)     | 17.85          | 58.67            | 34.5      | 65.5 | 2.8  | 39.53 | 23.02                       | 34.24 | 0.05 | 0.02 | 0.11 | -    | 0.02 | 0.09 | 97  |  |  |
|         | 1 (4)    | 28.8           | 47.42            | 99.5      | 0.5  | 0    | 37.84 | 0.1                         | 55.35 | 4.42 | 0.05 | -    | -    | -    | 0.03 | 99  |  |  |
| Kula    | 2(25)    | 28.8           | 47.42            | 88.7      | 11.2 | 0.7  | 37.93 | 2.57                        | 56.66 | 0.73 | 0.04 | -    | 0.02 | 0.02 | 0.03 | 99  |  |  |
|         | 5(8)     | 29             | 47.64            | 86.8      | 13.1 | -    | 36.03 | 3.46                        | 57.3  | 1.03 | 0.04 | 0.02 | 0.02 | 0.01 | -    | 98  |  |  |
| Konya   | 2(26)    | 11.71          | 61.27            | 89.5      | 10.8 | 0.4  | 38.66 | 2.73                        | 56.78 | 0.11 | 0.03 | 0.03 | 0.03 | 0.03 | 0.02 | 98  |  |  |
|         | 4(8)     | 12.68          | 61.82            | 0         | 100  | 21.2 | 28.31 | 48.44                       | 23.09 | 0.02 | 0.02 | 0.02 | 0.04 | 0.04 | -    | 99  |  |  |
|         | 2(10)    | 19             | 62.27            | 78.5      | 21.5 | 16.9 | 37.7  | 6.04                        | 53.47 | 1.71 | 0.02 | -    | -    | -    | -    | 98  |  |  |
| Ecuador | 4(10)    | 32             | 59.66            | 0         | 100  | 5.65 | 28.09 | 51.71                       | 21.05 | 0.37 | 0.11 | -    | -    | -    | -    | 100 |  |  |

865

## Figure Captions

Figure 1. World distribution of arc-related metallogenic belts showing the biggest Cu and/or Au porphyry deposits, modified from Richards, 2013 and Cooke et al., 2005. References of previous studies on magmatic sulfides are depicted with black stars whereas the areas considered in this study are shown with a red bigger star.

Figure 2. Tectonic (a) and geological maps (b-c) of the studied areas and associated Au epithermal and Cu, Au porphyry deposits in Western Anatolia. The investigated Miocene volcano-plutonic complexes are Konya (b) and the volcanoes of Usak basin (Elmadag, Itecektepe and Beydagi-c) as well as the Quaternary Kula volcano (c). The geological maps have been modified after; (b) Keller et al., 1977 and (c) Karaoğlu et al., 2010.

Figure 3. Major (a-d) and trace (e-h) element variations with SiO<sub>2</sub> for the different study areas, illustrated by a different shape and colour. Smaller in size symbols correspond to datasets obtained from other studies (Beydagi-Karaoğlu, 2010, Kula-Alici et al., 2002, Aldanmaz et al., 2002, 2015, Dilek et al., 2010, Ercan et al., 1985, Konya-Temel et al., 1998, Korkmaz et al., 2017). For comparison purposes whole rock chemistry from Ecuador has been illustrated as a field in the graphs (a-f). Spider graph-g showing the solid mean trace element distribution for the different study areas. For dataset see Tables 1-3 in doi:10.6084/m9.Figshare.8230787

Figure 4. Sulfide types observed in the different study areas [characterise by diverse geodynamic settings](#). The abbreviations stand for: pyrrhotite-po, pentlandite-pn, chalcopyrite-cp, chalcocite-cc, cubanite-cb, pyrite-py, bornite-bn, digenite-dg, anhydrite-anhy, apatite-apt, magnetite-mt, monosulfide solid solution-mss and intermediate solid solution-iss. The scale bar corresponds to 5 µm unless stated otherwise.

Figure 5. BSE (a-f,h) and SEI (g) microphotographs of sulfides, their host and accessory mineral phases. Important things to note: a) the common occurrence of apatite inclusions observed together with the sulfide and hosted by the same mineral (px in a and mt in b,f); b) the lack of sulfides in the biotite phenocrysts, even in the cases where the biotite itself includes a magnetite that hosts sulfides; c) the usual sulfide presence in the amphibole destabilised rim, where amphibole is being replaced by clinopyroxene, plagioclase and rhönite, characterising the Kula volcano (also seen by Grutzner et al., 2013); d) resorbed sulfide found in amphibole in (c) showing a rapid unmixing of the cp-cb (iss); e) unusually big (up to 600 µm) sulfide aggregate composed of mostly Cu-poor sulfides, magnetite and micro-sized silicates, found in Kula; f) partly dissolved sulfide hosted by magnetite that shows ilmenite exsolution lamellae, g) trail of bubbles of silicate melt and ~~vesicles~~ associated with the sulfide and h) daughter sulfide (<0.5 µm), composed mostly po found in re-crystallised melt inclusion hosted by olivine, observed in Kula. [For abbreviation see legend in Fig.4](#). The scale bar corresponds to 100 µm unless stated otherwise.

Figure 6. BSE (a,b-i,c-i,e,f) and SEI (b-ii,c-ii,d,e) microphotographs of anhydrite occurrences in magnetite phenocrysts, as individual phases or found together with Cu-rich sulfides and occasionally with zircons. Apatite and silicate melt are often hosted by the same magnetite phenocrysts as well. Note that the anhydrite; (b-i,f) in BSE is not visible unless seen in SEI (b-ii), it can be partly (d,e) or completely (c) dissolved. In image-e BSE and

SEI imaging have been merged in order to make both sulfide and sulphate, respectively visible. [For abbreviation see legend in Fig.4.](#) The scale bar corresponds to 2  $\mu\text{m}$  unless stated otherwise.

Figure 7. Sulfide composition in the Cu-Fe-S system and Ni-Fe-Cu from individual [mineral](#) analyses by EPMA. The colour shows the study area and the shape indicates the host mineral in which magmatic sulfides were found. Note the progressive Ni/Cu depletion as we switch from more mafic suites (e.g. Kula) and early crystallising host minerals (olivine, pyroxene and amphibole) to more evolved (e.g. Konya) and later crystallising mineral phases (magnetite). The grey fields correspond to analysis that resulted in Ni or Cu below determination limit equal to 0.01 wt% that however for discussion purposes have been shown here. ~~The measurements depicted with an error bar (cross) represent SEM analysis where the mineral phase was too small to analyse by EPMA, the error does not correspond to a quantitative value.~~ For dataset see Table 4 in doi:10.6084/m9.Figshare.8230787.

Figure 8. Box plot comparison of the Cu and Ni content (wt %) [resulting by individual mineral analyses](#) measured by EPMA for the different sulfide types characterising each study area. The central box is in the middle 50% of the data (total number of measurements considered is noted in parenthesis on the x axes). The line and dots in the box represent the median and mean value for each box/sulfide type, respectively (see values in Table 1). The outliers are further than 1.5\*(75th percentile/top of box-25th percentile/bottom of box) and the whiskers are the extreme values that are not outliers. Note that only Beydagi, Konya and Ecuador which are the three areas associated with porphyry deposits display the highest in Cu values of type 3 and 4 sulfides. [The stoichiometry of common sulfide mineral phases has been depicted for Cu and Ni \(wt %\) contents according to mindat.org.](#) For dataset see Table 4 in doi:10.6084/m9.Figshare.8230787.

Figure 9. Box plot comparison of the Cu-rich phase (chalcopyrite = iss) and Ni-rich phase (pyrrhotite±pentlandite = mss) proportions (area %) composing type-2 sulfides, calculated by ImageJ©1.38 software analysis for each study area (-N of [sulfides reconstructed](#)) sample; Kula=25, Itceektepe=16, Elmadag=10, Beydagi=15, Konya=25, Ecuador=35). Average, mean and median values are represented in the graph same as in Figure 8. For dataset see Table 5 in doi:10.6084/m9.Figshare.8230787.

Figure 10. Ternary isothermal sections through the central part of the Cu-Fe-S system according to and modified from (a,b,c) Kullerud et al., 1969, (d) Tsujimura and Kitakaze, 2004, (e) Cabri, 1973, (f,h) Yund and Kullerud 1966, (g) Craig and Scot, 1974. The stability fields and phase-relations at different temperatures are shown for; sulfide liquid-L (brown), bornite solid solution-bnss (purple), monosulfide solid solution-mss (pink), intermediate solid solution-iss (yellow) and digenite solid solution-dgss (blue). The data shown correspond to the bulk (area %) reconstructed sulfide compositions hosted by different phenocrysts/groundmass (shape) observed in every study areas (colour). For dataset see Table 5 in doi:10.6084/m9.Figshare.8230787.

**Commented [AAG22]:**

After the **comment of Referee#1**-Dan Smith:

C: I don't think these data add value. I would rather those that can't be measured in the ratio - particularly when analysed by a different, less sensitive technique - are just omitted.

R: We have removed the data from the graph as requested.

## Figures

Fig.1

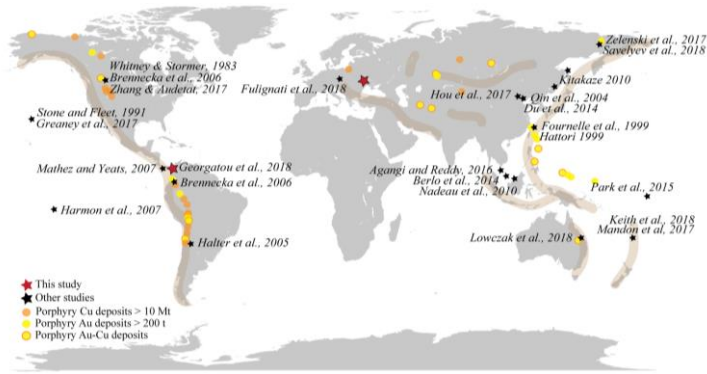

Fig.2

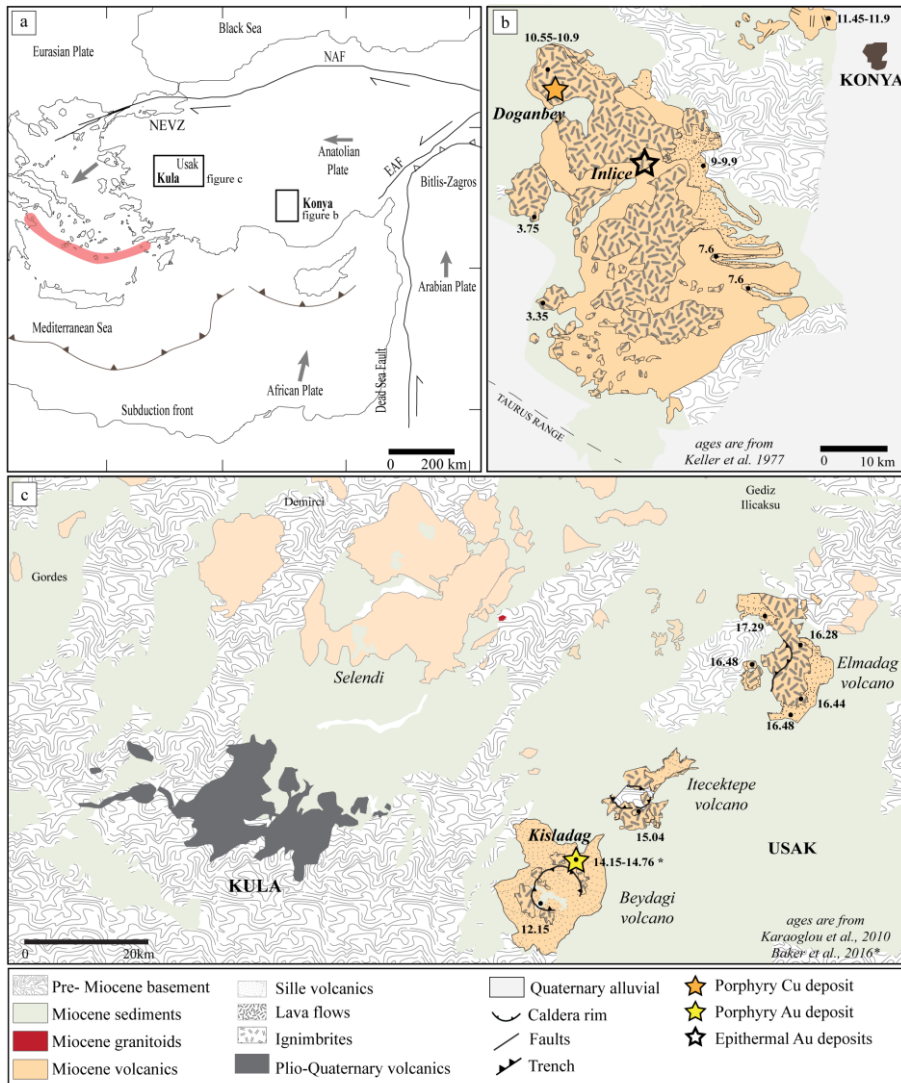

**Fig.3**

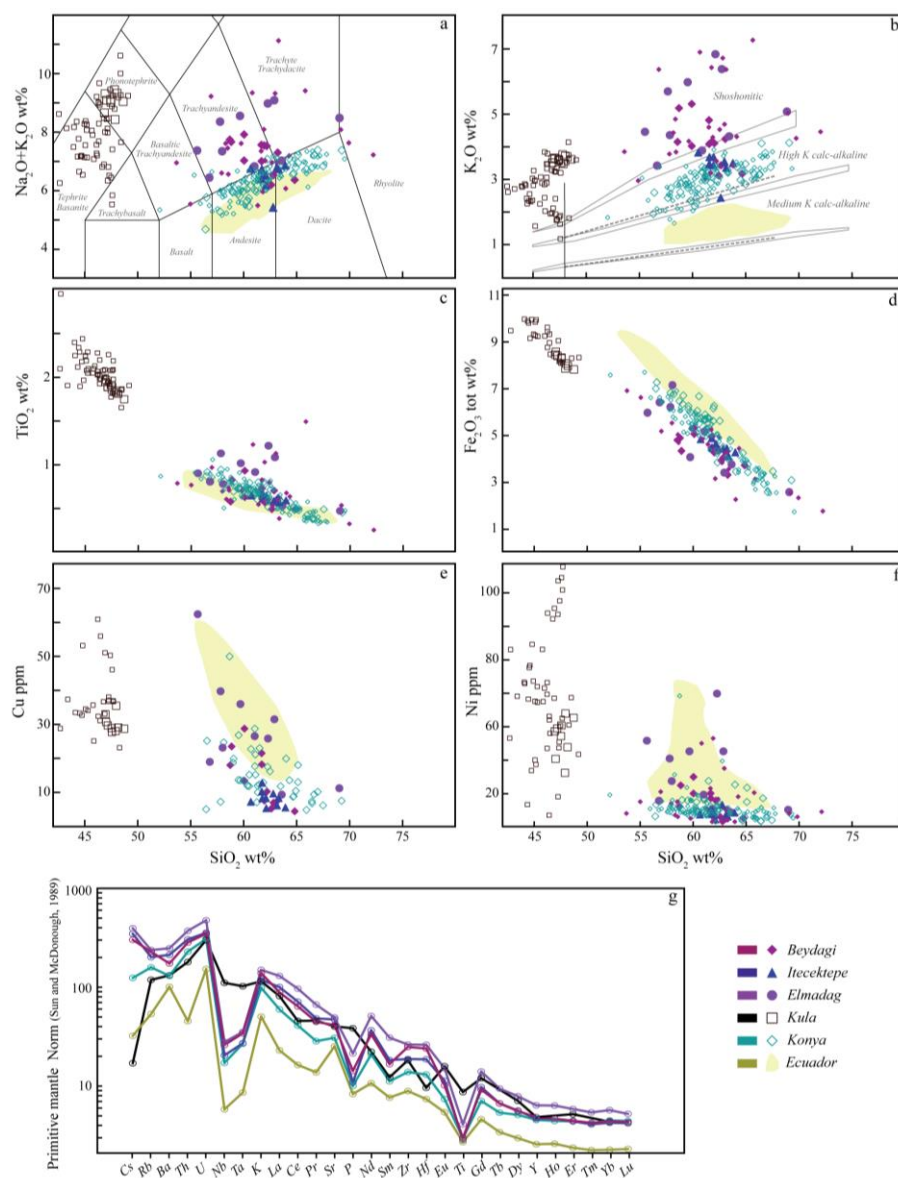

**Commented [AAG23]:**

After the comment of Referee#1-Dan Smith:

C: Molecular formulae on axes all need subscripts for stoichiometry.

Ch: We have corrected for subscription, added the ' $\text{SiO}_2$ ' that was missing at the x axes, specified the total for  $\text{Fe}_2\text{O}_3$  and corrected  $\text{TiO}_2$ .

950

Fig.4

**Commented [AAG24]:** We have extended the figure by adding the geodynamic setting as requested by Referee#1- Dan Smith. In addition we have changes the 'ph' to 'f' for Sulfide types.

| Intraplate-OIB                                                                            | Post-Subduction                                                                          |                                                                                         |                                                                                             |                                                                                            | Syn-Subduction                                                                             | Sulfide types                                                                              |                   |
|-------------------------------------------------------------------------------------------|------------------------------------------------------------------------------------------|-----------------------------------------------------------------------------------------|---------------------------------------------------------------------------------------------|--------------------------------------------------------------------------------------------|--------------------------------------------------------------------------------------------|--------------------------------------------------------------------------------------------|-------------------|
| KULA                                                                                      | ITECEKTEPE                                                                               | ELMADAG                                                                                 | BEYDAGI                                                                                     | KONYA                                                                                      | ECUADOR                                                                                    |                                                                                            |                   |
| 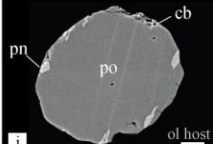<br>i    |                                                                                          |                                                                                         |                                                                                             |                                                                                            |                                                                                            | <br>a   | 1: mss +/- iss    |
| <br>ii   | <br>iii | <br>iv | <br>v     | <br>vi  | <br>vii | <br>b   | 2: mss > + iss    |
|                                                                                           |                                                                                          |                                                                                         | <br>viii  |                                                                                            |                                                                                            | <br>c   | 3: iss > + mss    |
|                                                                                           |                                                                                          |                                                                                         |                                                                                             | <br>ix | <br>x  | <br>d  | 4: iss +/- anhy   |
| <br>xi |                                                                                          |                                                                                         | <br>xii |                                                                                            |                                                                                            | <br>e | 5: mss + iss + ox |
| barren                                                                                    | barren                                                                                   | barren                                                                                  | Kisladag Au-Mo porphyry deposit                                                             | Doganbey Cu-Au porphyry and Inlice Au epithermal deposit                                   | Cascabel and Llurimagua Cu porphyry and Corazon Au epithermal deposits                     |                                                                                            | ORE               |

951



952 **Fig.5**

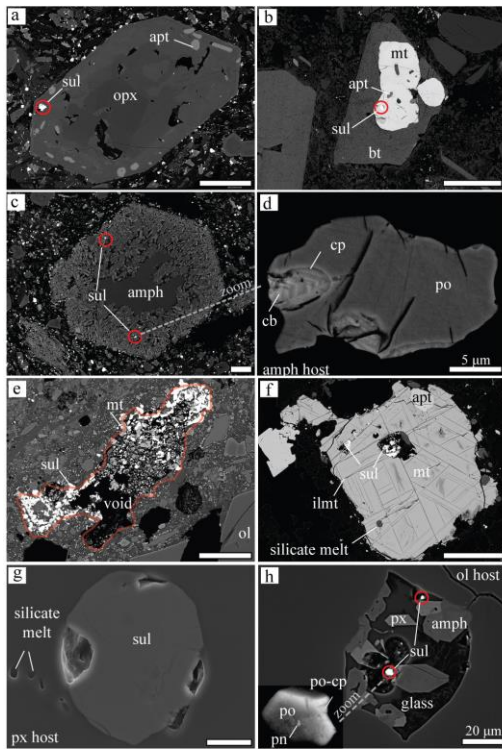

953

954 **Fig.6**

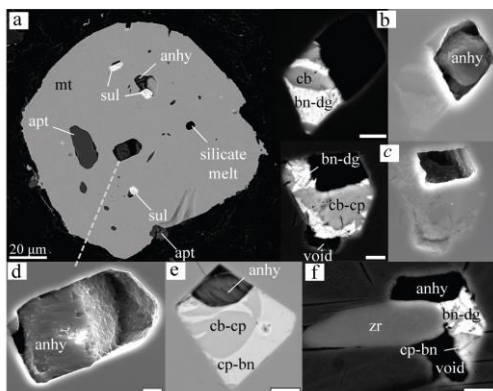

955

956

957 **Fig.7**

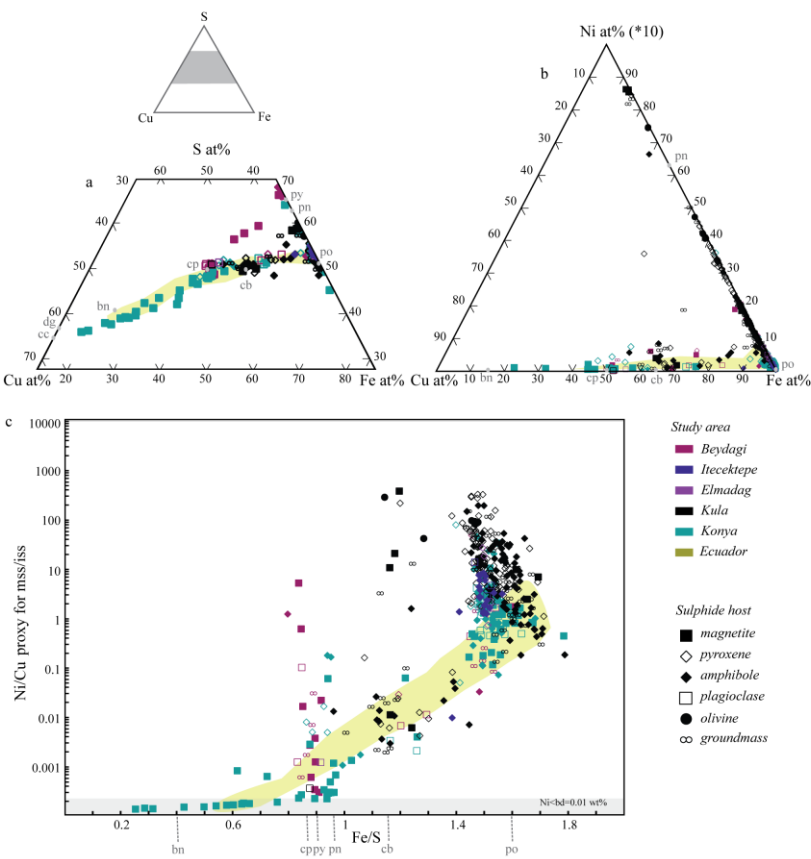

**Commented [AAG25]:** We have added on the graphs the common mineral phases and we have removed the SEM data from graph-c as requested by Referee#1-Dan Smith

958

959 Fig.8

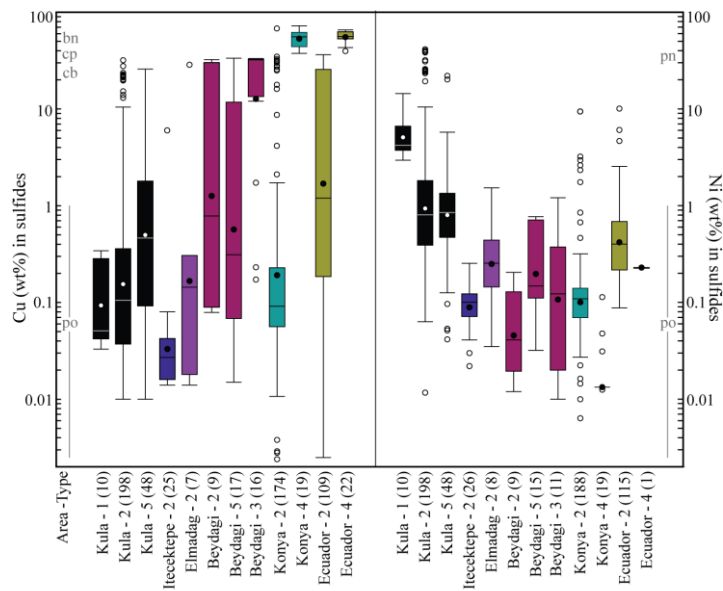

**Commented [AAG26]:** We have added the common mineral phases on the axes and changed the 'ph' to 'f' in the word sulfides

960  
961 Fig.9

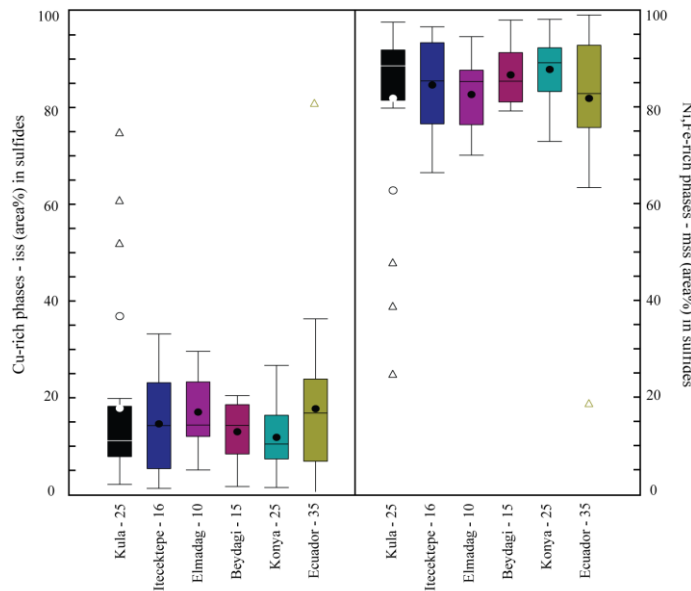

**Commented [AAG27]:** Since all sulfides considered in this graph are Type-2 sulfides, which is indicated in the figure legend, we have included the number of sulfides considered for each area on the x axes instead. We also changed the 'ph' to 'f' in the word sulfides

962

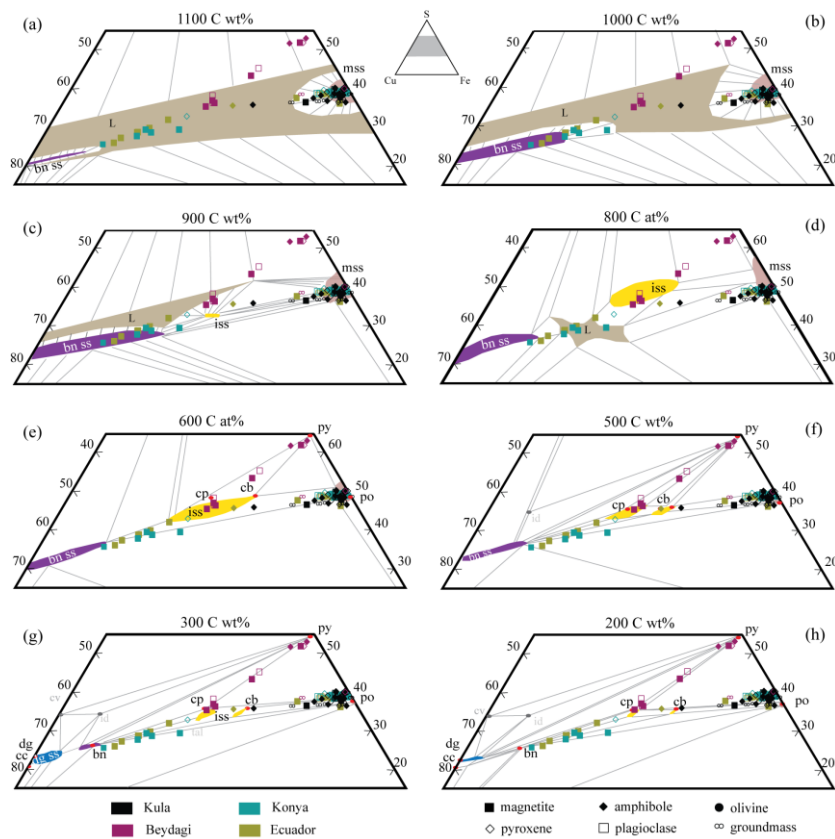

Supplement: Supplementary file [file Manuscript_Corrected.pdf › Manuscript_Corrected.pdf]
